# Supplementary material for: Copper-dipyridylphosphine-catalyzed hydrosilylation: enantioselective synthesis of aryl- and heteroarylcycloalkyl alcohols
Source: Royal Society of Chemistry journal article supplement (doi:10.1039/c2ob27040d), 2012-11-29

## Supporting information for

### **Copper-dipyridylphosphine-catalyzed hydrosilylation: Enantioselective synthesis of aryl- and heteroaryl cycloalkyl alcohols†**

Shan-Bin Qi,<sup>a</sup> Min Li,<sup>a</sup> Shijun Li,<sup>a</sup> Ji-Ning Zhou,<sup>a</sup> Jun-Wen Wu,<sup>a</sup> Feng Yu,<sup>a</sup> Xi-  
Chang Zhang,<sup>a</sup> Albert S. C. Chan<sup>b</sup> and Jing Wu\*<sup>a</sup>

<sup>a</sup> *College of Material, Chemistry and Chemical Engineering, Hangzhou Normal University,  
Hangzhou 310036, China*

<sup>b</sup> *Institute of Creativity, Hong Kong Baptist University, Hong Kong*

Fax : (+86)-571-2886-8023; E-mail: jingwubc@hznu.edu.cn

### **Table of Contents**

|                                                      |     |
|------------------------------------------------------|-----|
| GC and HPLC Spectra for Chiral Alcohol Products..... | S2  |
| NMR Spectra for Alcohol Products.....                | S31 |

(S)-Cyclopentylphenylmethanol (1a):

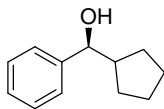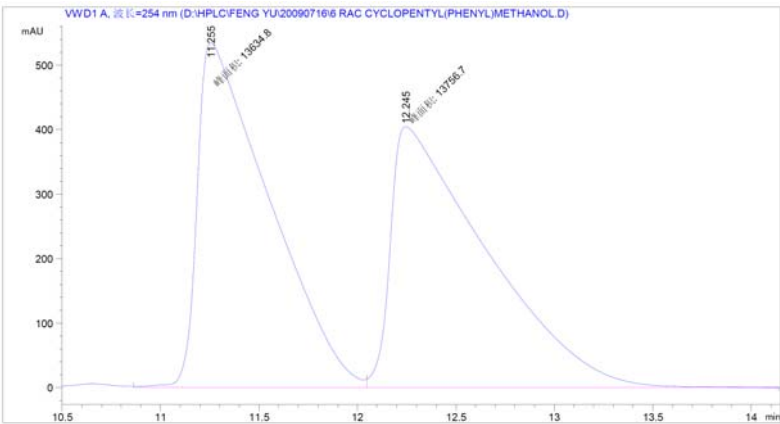

| Peak # | RetTime (min) | Width (min) | Area (mAU*S) | Height (mAU) | Area (%) |
|--------|---------------|-------------|--------------|--------------|----------|
| 1      | 11.255 MF     | 0.4245      | 1.36348e4    | 535.32330    | 49.7775  |
| 2      | 12.245 FM     | 0.5655      | 1.37567e4    | 405.43674    | 50.2225  |

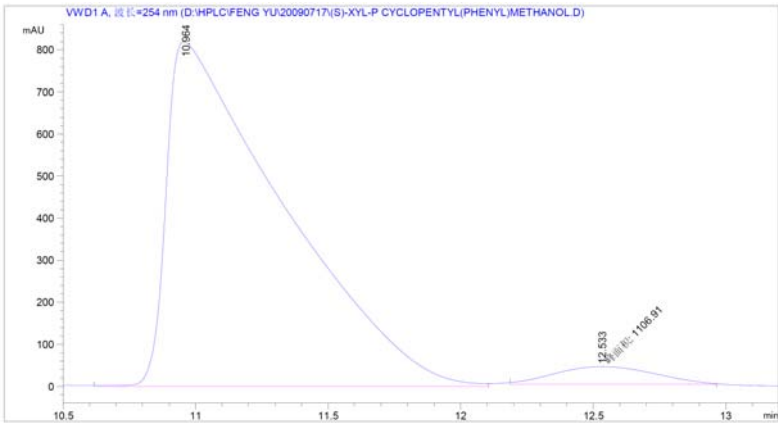

| Peak # | RetTime (min) | Width (min) | Area (mAU*S) | Height (mAU) | Area (%) |
|--------|---------------|-------------|--------------|--------------|----------|
| 1      | 10.964 VV     | 0.4217      | 2.50345e4    | 816.74500    | 95.7657  |
| 2      | 12.533 MM     | 0.4408      | 1106.91162   | 41.85217     | 4.2343   |

(S)-Cyclopropylphenylmethanol (2a):

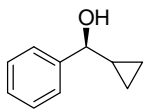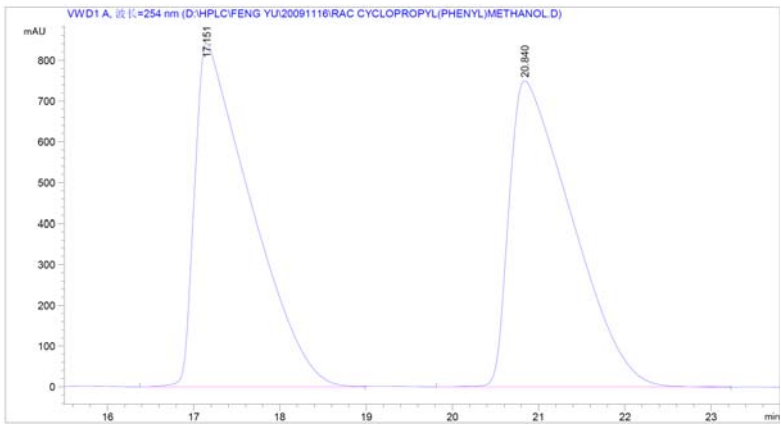

| Peak # | RetTime (min) | Width (min) | Area (mAU*S) | Height (mAU) | Area (%) |
|--------|---------------|-------------|--------------|--------------|----------|
| 1      | 17.151 VV     | 0.6448      | 3.81346e4    | 842.05762    | 50.1763  |
| 2      | 20.840 VB     | 0.8104      | 3.78667e4    | 749.87360    | 49.8237  |

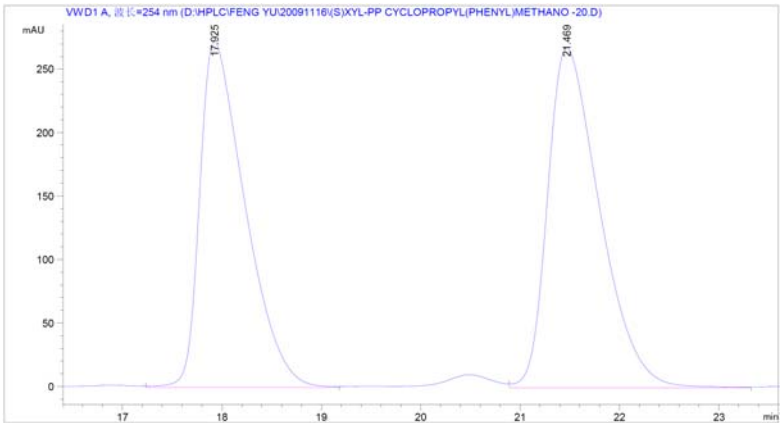

| Peak # | RetTime (min) | Width (min) | Area (mAU*S) | Height (mAU) | Area (%) |
|--------|---------------|-------------|--------------|--------------|----------|
| 1      | 17.925 VV     | 0.4810      | 8641.12695   | 272.20230    | 46.9581  |
| 2      | 21.469 VB     | 0.5535      | 9760.64941   | 267.72116    | 53.0419  |

(S)-Cyclobutylphenylmethanol (3a):

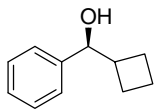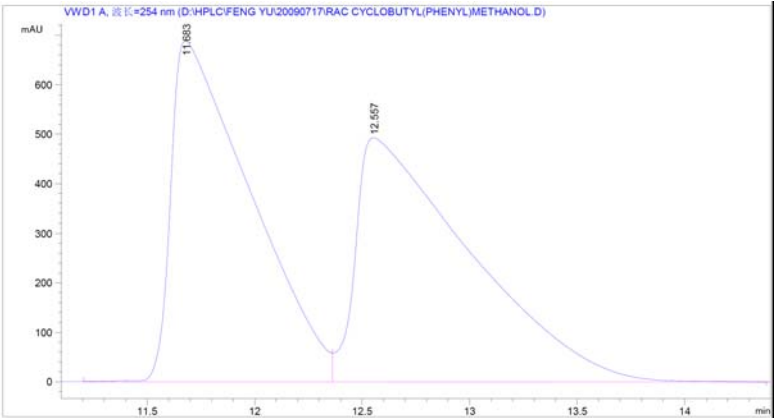

| Peak # | RetTime (min) | Width (min) | Area (mAU*S) | Height (mAU) | Area (%) |
|--------|---------------|-------------|--------------|--------------|----------|
| 1      | 11.683        | 0.3728      | 1.77224e4    | 689.26727    | 49.2150  |
| 2      | 12.557        | 0.5434      | 1.82877e4    | 493.07257    | 50.7850  |

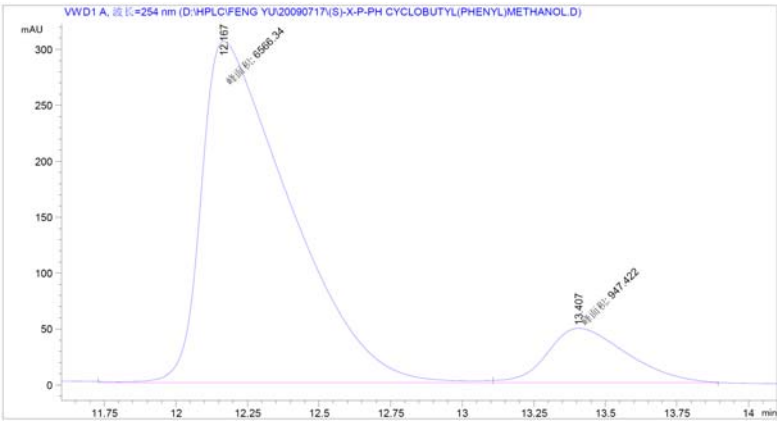

| Peak # | RetTime (min) | Width (min) | Area (mAU*S) | Height (mAU) | Area (%) |
|--------|---------------|-------------|--------------|--------------|----------|
| 1      | 12.167        | 0.3579      | 6566.34375   | 305.75031    | 87.3909  |
| 2      | 13.407        | 0.3230      | 947.42151    | 48.88227     | 12.6091  |

**(S)-Cyclohexylphenylmethanol (4a):**

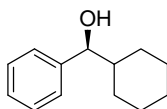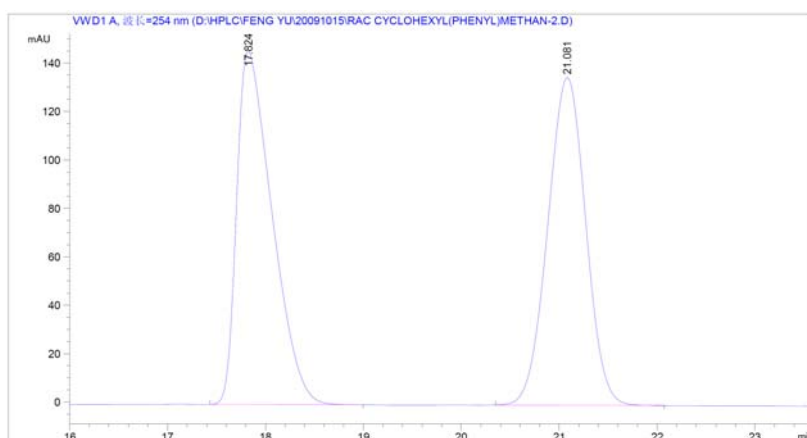

| Peak # | RetTime (min) | Width (min) | Area (mAU*S) | Height (mAU) | Area (%) |
|--------|---------------|-------------|--------------|--------------|----------|
| 1      | 17.824 BB     | 0.3830      | 3661.22290   | 145.91125    | 50.0963  |
| 2      | 21.081 BB     | 0.4222      | 3647.14746   | 135.30301    | 49.9037  |

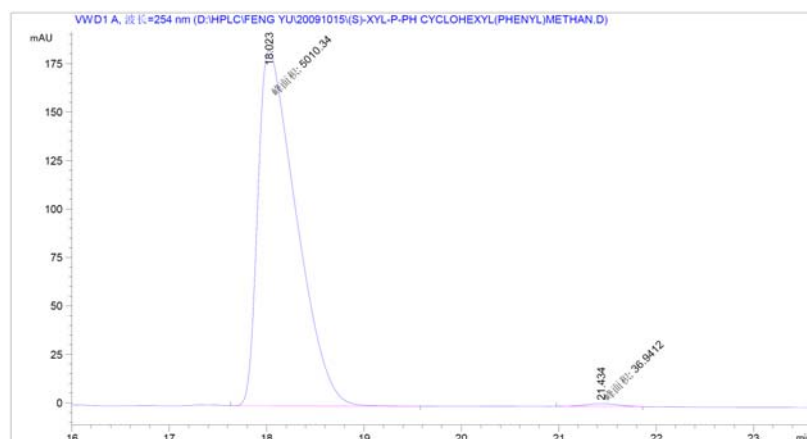

| Peak # | RetTime (min) | Width (min) | Area (mAU*S) | Height (mAU) | Area (%) |
|--------|---------------|-------------|--------------|--------------|----------|
| 1      | 18.023 MM     | 0.4544      | 5010.34473   | 183.75435    | 99.2681  |
| 2      | 21.434 MM     | 0.4123      | 36.94121     | 1.49345      | 0.7319   |

**(-)-(2-Chlorophenyl)cyclopropylmethanol (2b)**

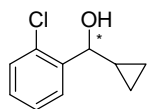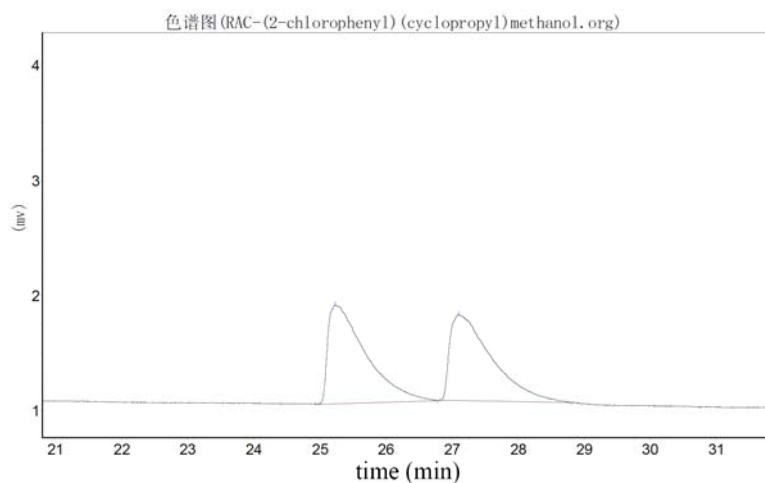

| Peak    | RetTime (min) | Height (mv) | Area (mv) | Area (%) |
|---------|---------------|-------------|-----------|----------|
| 1       | 25.232        | 851.811     | 33908.699 | 50.6311  |
| 2       | 27.098        | 746.496     | 33063.398 | 49.3689  |
| Totals: |               | 1598.307    | 66972.098 | 100.0000 |

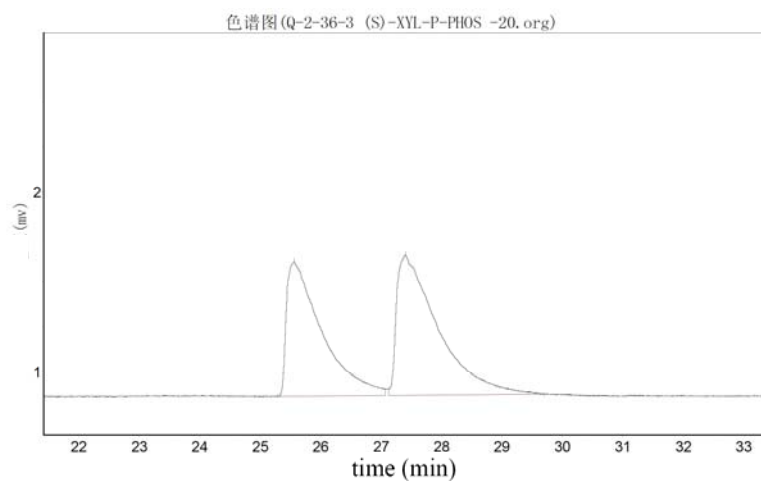

| Peak    | RetTime (min) | Height (mv) | Area (mv) | Area (%) |
|---------|---------------|-------------|-----------|----------|
| 1       | 25.565        | 750.974     | 30666.568 | 45.2175  |
| 2       | 27.398        | 782.332     | 37153.613 | 54.7825  |
| Totals: |               | 1533.306    | 67820.182 | 100.0000 |

**(+)-3-(Bromophenyl)cyclopropylmethanol (2d)**

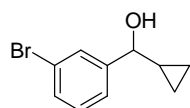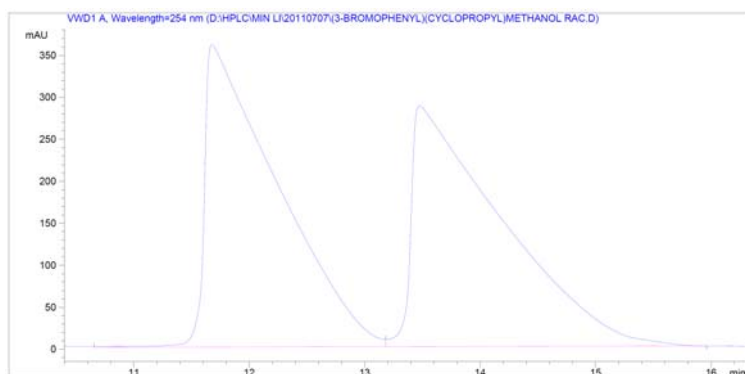

| Peak # | RetTime [min] | Type | Width [min] | Area mAU *s | Area %  |
|--------|---------------|------|-------------|-------------|---------|
| 1      | 11.678        | VV   | 0.5742      | 1.57917e4   | 50.2622 |
| 2      | 13.476        | VB   | 0.7094      | 1.56269e4   | 49.7378 |

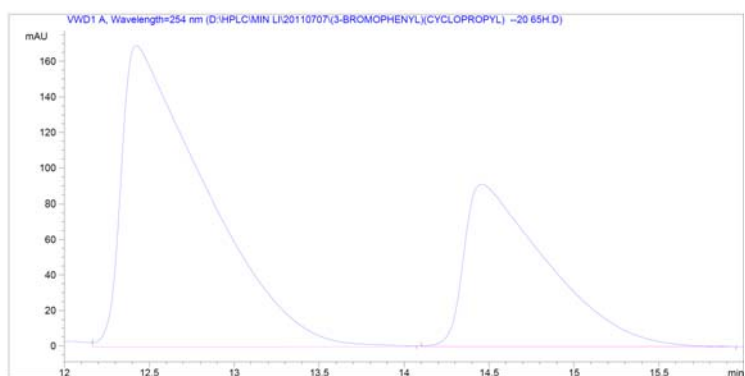

| Peak # | RetTime [min] | Type | Width [min] | Area mAU *s | Area %  |
|--------|---------------|------|-------------|-------------|---------|
| 1      | 12.424        | VB   | 0.4688      | 5874.97510  | 65.4381 |
| 2      | 14.456        | BB   | 0.4824      | 3102.93237  | 34.5619 |

**(+)-(3-Methoxyphenyl)cyclopropylmethanol (2e)**

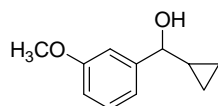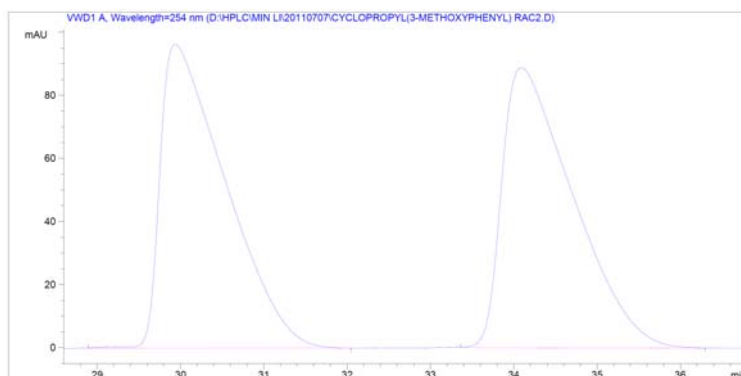

| Peak # | RetTime [min] | Type | Width [min] | Area mAU   | Area *s | Area %  |
|--------|---------------|------|-------------|------------|---------|---------|
| 1      | 29.937        | BB   | 0.8368      | 5248.84326 |         | 49.9549 |
| 2      | 34.093        | BB   | 0.8601      | 5258.31787 |         | 50.0451 |

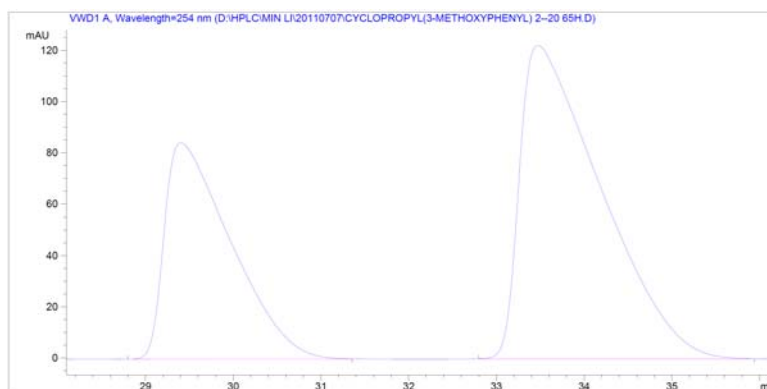

| Peak # | RetTime [min] | Type | Width [min] | Area mAU   | Area *s | Area %  |
|--------|---------------|------|-------------|------------|---------|---------|
| 1      | 29.405        | BB   | 0.7868      | 4432.29590 |         | 36.0366 |
| 2      | 33.474        | BB   | 0.9778      | 7867.12109 |         | 63.9634 |



**(+)-(4-Chlorophenyl)cyclopropylmethanol (2f)**

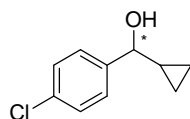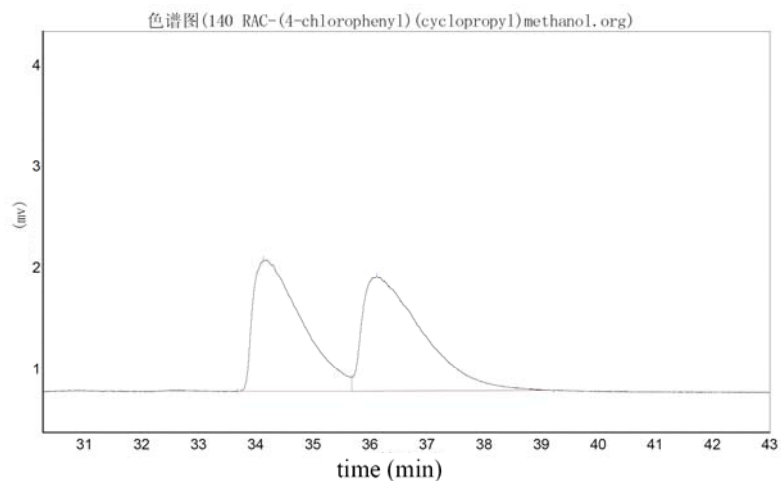

| Peak    | RetTime (min) | Height (mv) | Area (mv)  | Area (%) |
|---------|---------------|-------------|------------|----------|
| 1       | 34.140        | 1300.089    | 77499.648  | 48.4227  |
| 2       | 36.132        | 1132.130    | 82548.453  | 51.5773  |
| Totals: |               | 2432.218    | 160048.102 | 100.0000 |

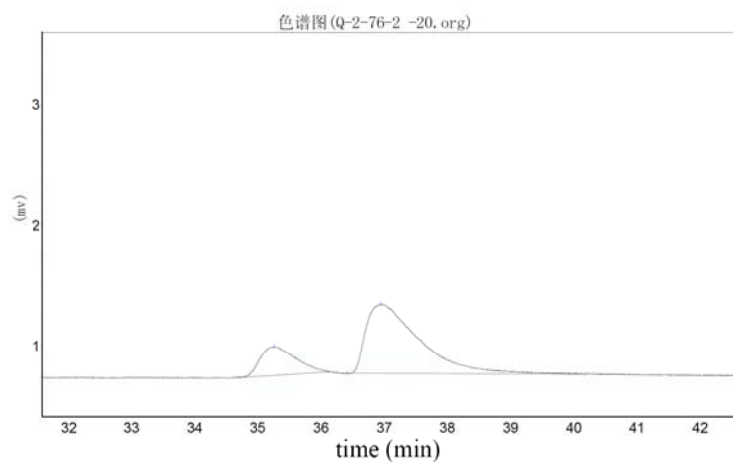

| Peak    | RetTime (min) | Height (mv) | Area (mv) | Area (%) |
|---------|---------------|-------------|-----------|----------|
| 1       | 35.257        | 234.541     | 9268.300  | 21.3725  |
| 2       | 36.948        | 569.566     | 34097.199 | 78.6275  |
| Totals: |               | 804.107     | 43365.499 | 100.0000 |

**(-)-(2-Chlorophenyl)cyclopentylmethanol (1b)**

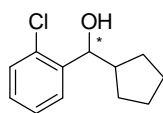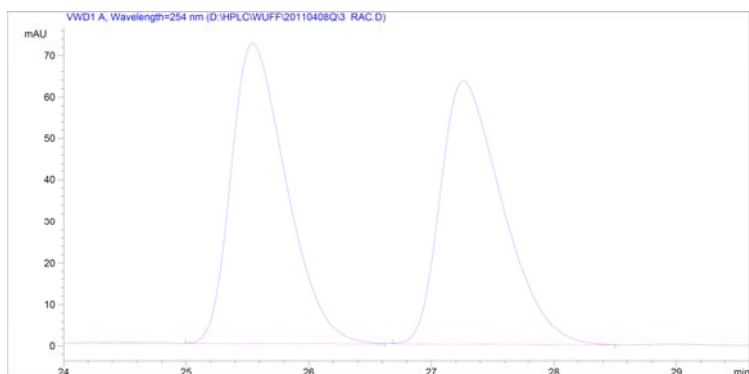

| Peak # | RetTime [min] | Type | Width [min] | Area mAU *s | Area %  |
|--------|---------------|------|-------------|-------------|---------|
| 1      | 25.541        | BB   | 0.4834      | 2264.45972  | 50.3463 |
| 2      | 27.261        | BB   | 0.5423      | 2233.30713  | 49.6537 |

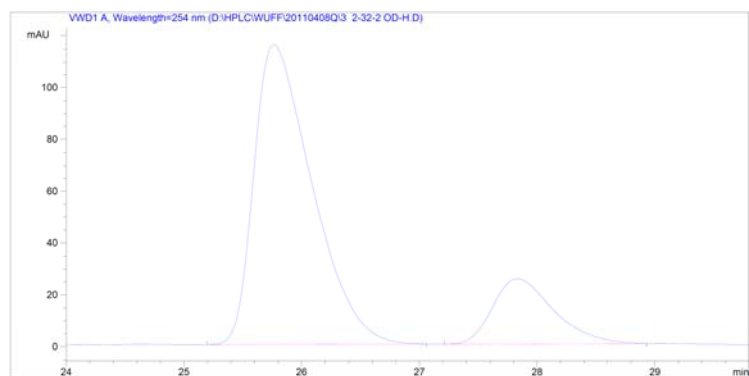

| Peak # | RetTime [min] | Type | Width [min] | Area mAU *s | Area %  |
|--------|---------------|------|-------------|-------------|---------|
| 1      | 25.764        | BB   | 0.5219      | 3986.69922  | 81.4177 |
| 2      | 27.832        | BB   | 0.5480      | 909.89978   | 18.5823 |

(–)-Cyclopentyl(2-methoxyphenyl)methanol (1c)

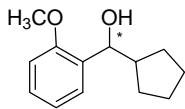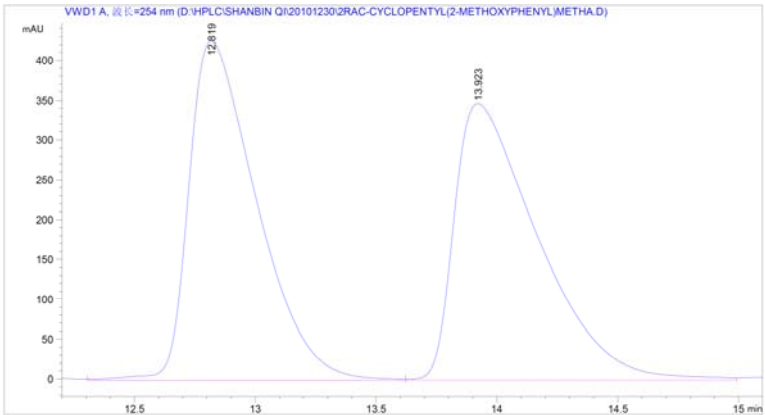

| Peak # | RetTime (min) | Width (min) | Area (mAU*S) | Height (mAU) | Area (%) |
|--------|---------------|-------------|--------------|--------------|----------|
| 1      | 12.819 VV     | 0.2979      | 8341.46484   | 426.72961    | 49.9453  |
| 2      | 13.923 VV     | 0.3619      | 8359.74414   | 347.88449    | 50.0547  |

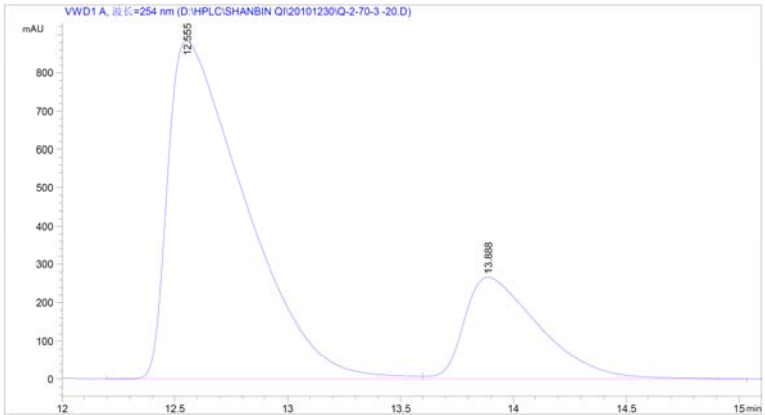

| Peak # | RetTime (min) | Width (min) | Area (mAU*S) | Height (mAU) | Area (%) |
|--------|---------------|-------------|--------------|--------------|----------|
| 1      | 12.555 VV     | 0.3570      | 2.11215e4    | 885.07635    | 77.2027  |
| 2      | 13.888 VV     | 0.3474      | 6237.02002   | 267.78143    | 22.7973  |

(–)-(3-Bromophenyl)cyclopentylmethanol (1d)

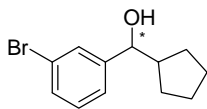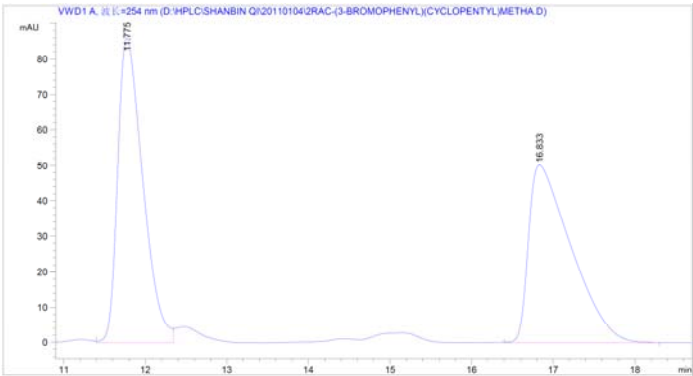

| Peak # | RetTime (min) | Width (min) | Area (mAU*S) | Height (mAU) | Area (%) |
|--------|---------------|-------------|--------------|--------------|----------|
| 1      | 11.775 VV     | 0.3293      | 1850.57092   | 86.14337     | 50.3149  |
| 2      | 16.833 BB     | 0.5373      | 1827.40735   | 50.31456     | 49.6851  |

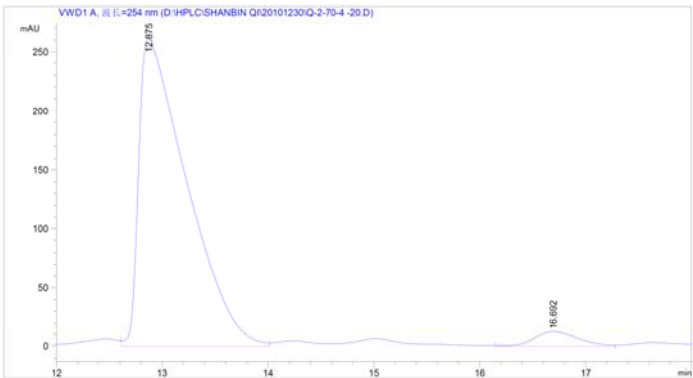

| Peak # | RetTime (min) | Width (min) | Area (mAU*S) | Height (mAU) | Area (%) |
|--------|---------------|-------------|--------------|--------------|----------|
| 1      | 12.875 VV     | 0.4681      | 8265.61523   | 261.25867    | 95.8148  |
| 2      | 16.692 VV     | 0.4382      | 361.04486    | 12.63527     | 4.1852   |

(–)-Cyclopentyl(3-methoxyphenyl)methanol (1e)

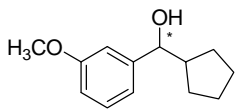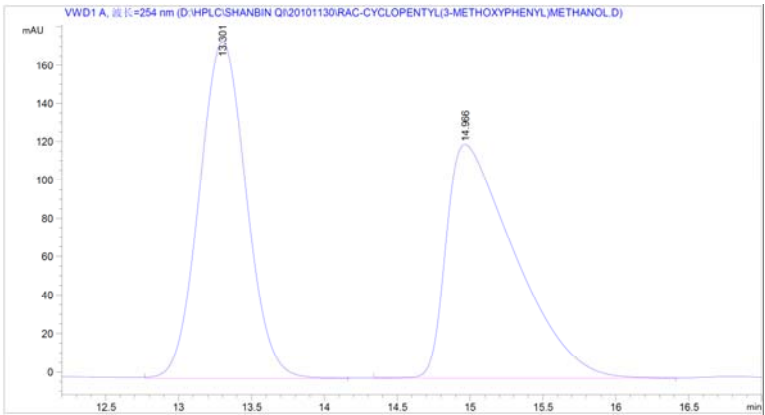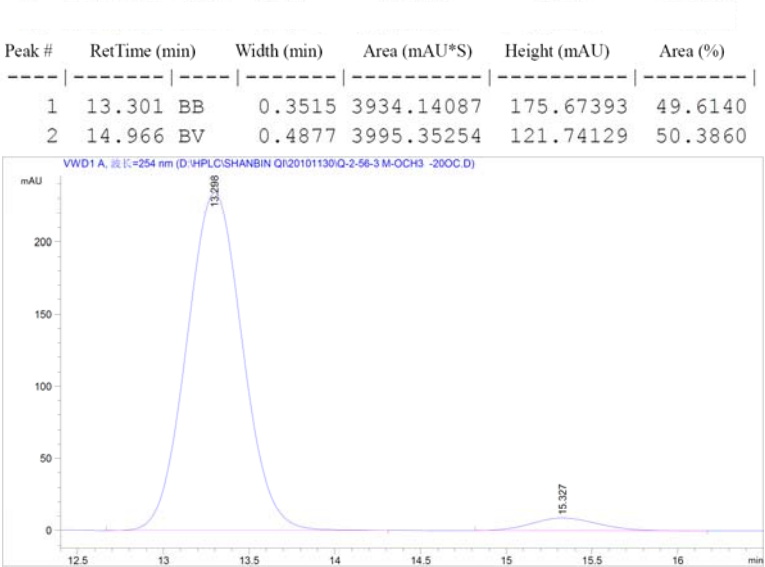

(-)-Cyclopentyl(4-(trifluoromethyl)phenyl)methanol (1f)

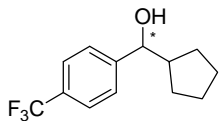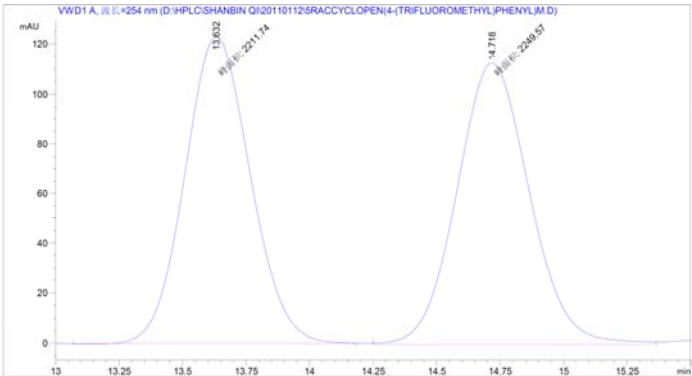

| Peak # | RetTime (min) | Width (min) | Area (mAU*S) | Height (mAU) | Area (%) |
|--------|---------------|-------------|--------------|--------------|----------|
| 1      | 13.632 MM     | 0.2992      | 2211.74243   | 123.19153    | 49.5761  |
| 2      | 14.718 MM     | 0.3319      | 2249.56738   | 112.96291    | 50.4239  |

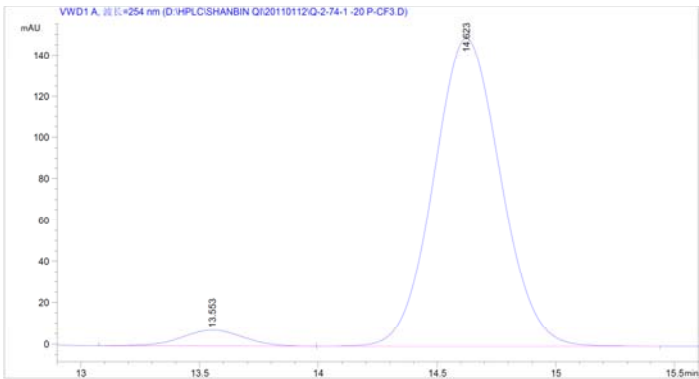

| Peak # | RetTime (min) | Width (min) | Area (mAU*S) | Height (mAU) | Area (%) |
|--------|---------------|-------------|--------------|--------------|----------|
| 1      | 13.553 VV     | 0.2811      | 138.73685    | 7.66467      | 4.5358   |
| 2      | 14.623 VB     | 0.3041      | 2919.97046   | 149.17525    | 95.4642  |

(-)-Cyclopentyl(*p*-tolyl)methanol (1g)

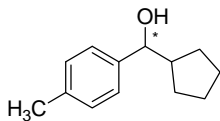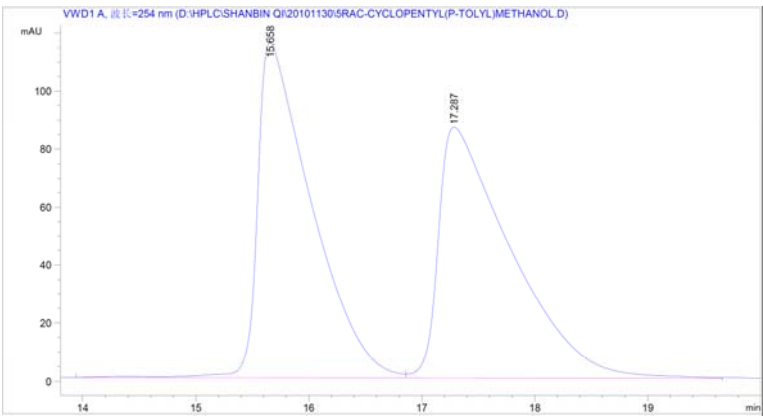

| Peak # | RetTime (min) | Width (min) | Area (mAU*S) | Height (mAU) | Area (%) |
|--------|---------------|-------------|--------------|--------------|----------|
| 1      | 15.658 BV     | 0.4755      | 3840.20166   | 115.44290    | 50.0148  |
| 2      | 17.287 VB     | 0.6356      | 3837.92456   | 86.25433     | 49.9852  |

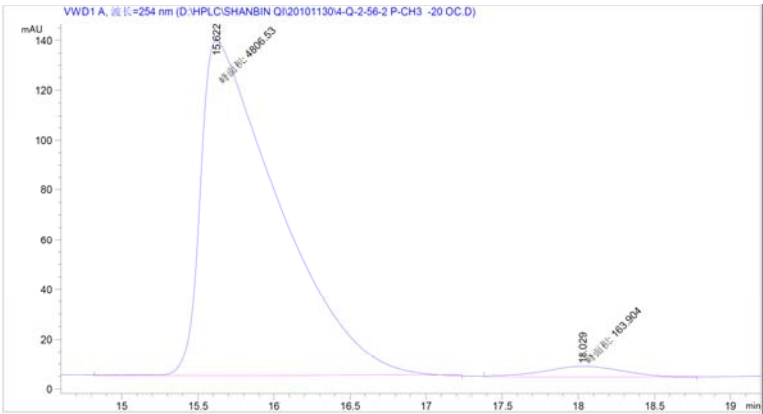

| Peak # | RetTime (min) | Width (min) | Area (mAU*S) | Height (mAU) | Area (%) |
|--------|---------------|-------------|--------------|--------------|----------|
| 1      | 15.622 MM     | 0.5950      | 4806.53369   | 134.62660    | 96.7024  |
| 2      | 18.029 MM     | 0.6260      | 163.90361    | 4.36410      | 3.2976   |

(-)-(2-Chlorophenyl)cyclohexylmethanol (4b)

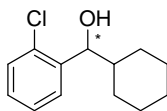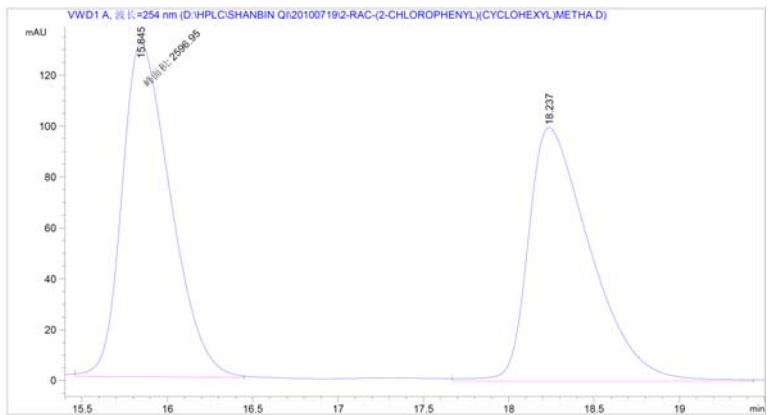

| Peak # | RetTime (min) | Width (min) | Area (mAU*S) | Height (mAU) | Area (%) |
|--------|---------------|-------------|--------------|--------------|----------|
| 1      | 15.845 MM     | 0.3303      | 2596.95459   | 131.04326    | 50.7220  |
| 2      | 18.237 VB     | 0.3829      | 2523.02368   | 99.58349     | 49.2780  |

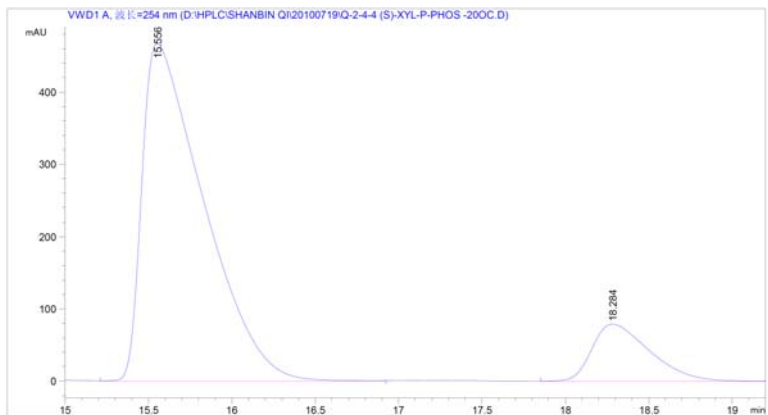

| Peak # | RetTime (min) | Width (min) | Area (mAU*S) | Height (mAU) | Area (%) |
|--------|---------------|-------------|--------------|--------------|----------|
| 1      | 15.556 VV     | 0.3828      | 1.20763e4    | 467.65866    | 86.1586  |
| 2      | 18.284 VB     | 0.3719      | 1940.05896   | 79.54913     | 13.8414  |



(-)-Cyclohexyl(*o*-tolyl)methanol (4c)

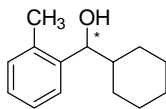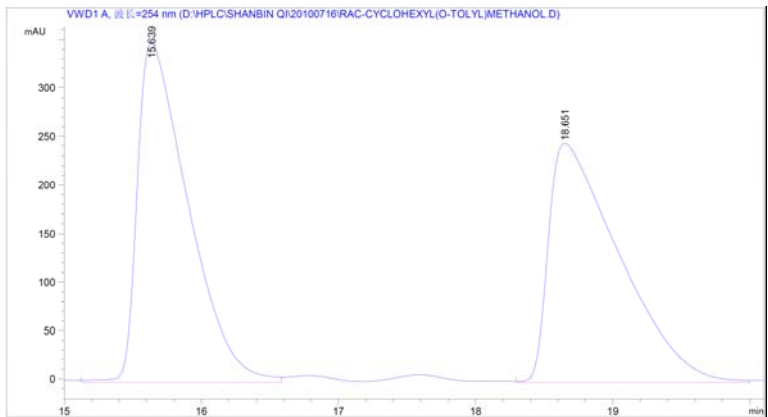

| Peak # | RetTime (min) | Width (min) | Area (mAU*S) | Height (mAU) | Area (%) |
|--------|---------------|-------------|--------------|--------------|----------|
| 1      | 15.639 VV     | 0.3858      | 9035.51172   | 349.79306    | 50.4923  |
| 2      | 18.651 VV     | 0.5331      | 8859.32422   | 246.35036    | 49.5077  |

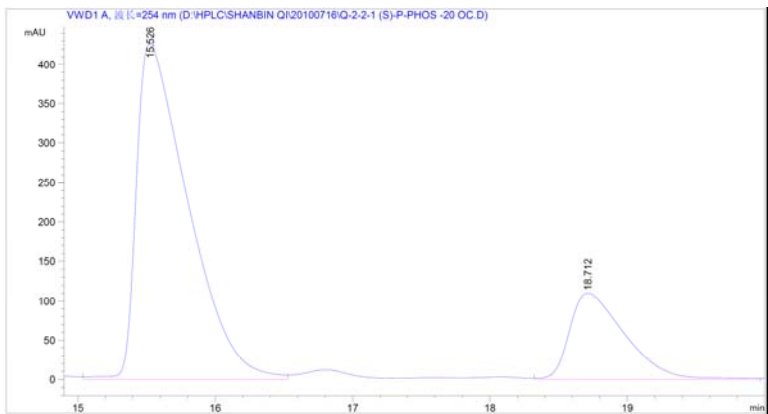

| Peak # | RetTime (min) | Width (min) | Area (mAU*S) | Height (mAU) | Area (%) |
|--------|---------------|-------------|--------------|--------------|----------|
| 1      | 15.526 VV     | 0.3894      | 1.11602e4    | 426.95923    | 78.3886  |
| 2      | 18.712 VV     | 0.4252      | 3076.82080   | 110.05180    | 21.6114  |

(-)-(3-Bromophenyl)cyclohexylmethanol (4d)

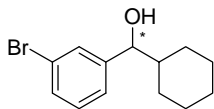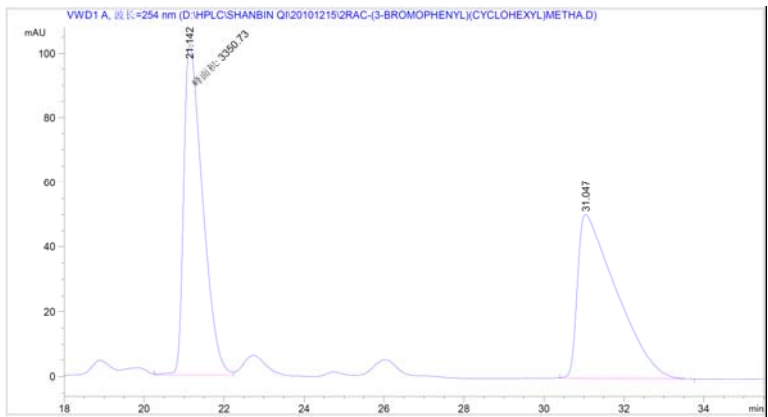

| Peak # | RetTime (min) | Width (min) | Area (mAU*S)      | Height (mAU) | Area (%) |
|--------|---------------|-------------|-------------------|--------------|----------|
| 1      | 21.142        | MM          | 0.5456 3350.72974 | 102.35719    | 49.6153  |
| 2      | 31.047        | BB          | 0.9491 3402.68726 | 50.50567     | 50.3847  |

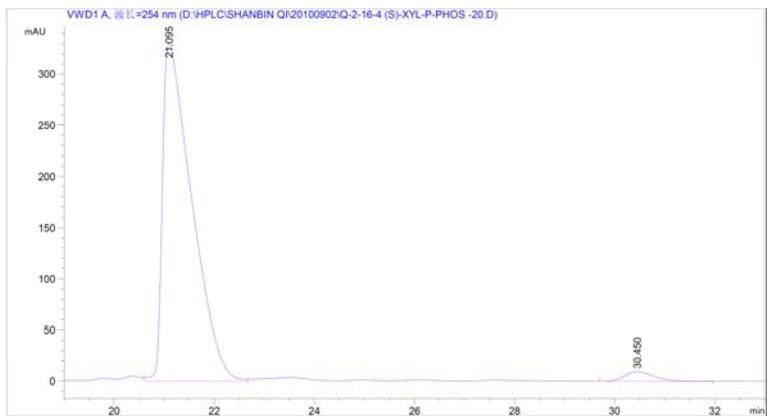

| Peak # | RetTime (min) | Width (min) | Area (mAU*S)     | Height (mAU) | Area (%) |
|--------|---------------|-------------|------------------|--------------|----------|
| 1      | 21.095        | VV          | 0.5899 1.34217e4 | 330.74841    | 97.2360  |
| 2      | 30.450        | BB          | 0.6381 381.52505 | 9.25691      | 2.7640   |

(S)-Cyclohexyl(3-methoxyphenyl)methanol (4e)

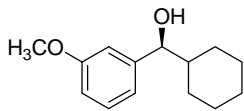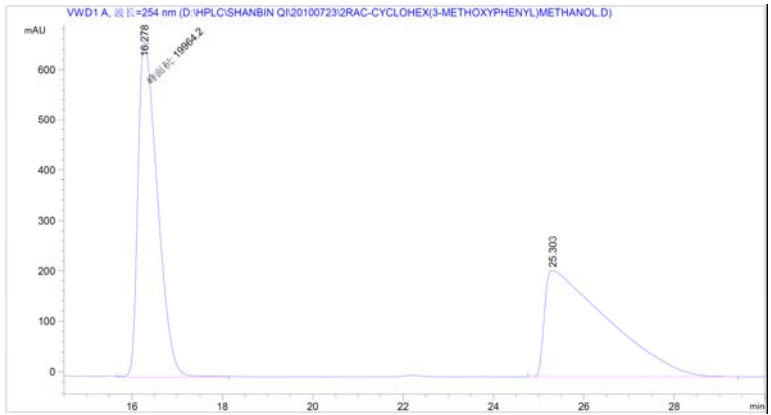

| Peak # | RetTime (min) | Width (min) | Area (mAU*S) | Height (mAU) | Area (%) |
|--------|---------------|-------------|--------------|--------------|----------|
| 1      | 16.278 MM     | 0.4993      | 1.99642e4    | 666.44714    | 49.4384  |
| 2      | 25.303 BB     | 1.2956      | 2.04177e4    | 210.87326    | 50.5616  |

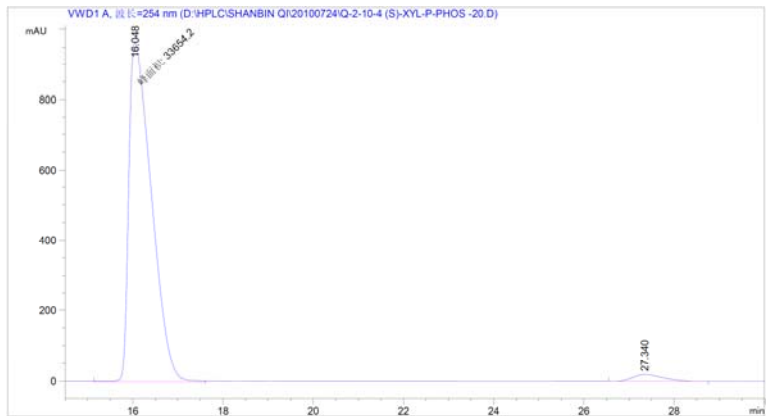

| Peak # | RetTime (min) | Width (min) | Area (mAU*S) | Height (mAU) | Area (%) |
|--------|---------------|-------------|--------------|--------------|----------|
| 1      | 16.048 MM     | 0.5807      | 3.36542e4    | 965.90979    | 97.4140  |
| 2      | 27.340 BB     | 0.7157      | 893.40582    | 19.37197     | 2.5860   |

(-)-Cyclohexyl(4-(trifluoromethyl)phenyl)methanol (4f)

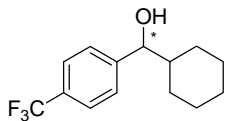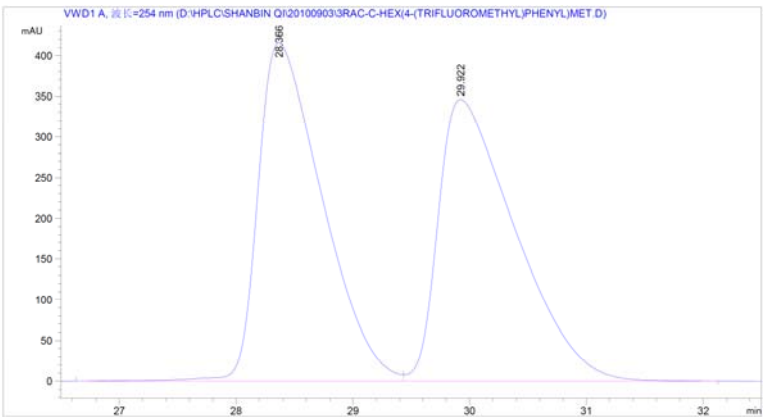

| Peak # | RetTime (min) | Width (min) | Area (mAU*S) | Height (mAU) | Area (%) |
|--------|---------------|-------------|--------------|--------------|----------|
| 1      | 28.366 BV     | 0.5797      | 1.58923e4    | 415.93094    | 50.0425  |
| 2      | 29.922 VB     | 0.6859      | 1.58653e4    | 346.29520    | 49.9575  |

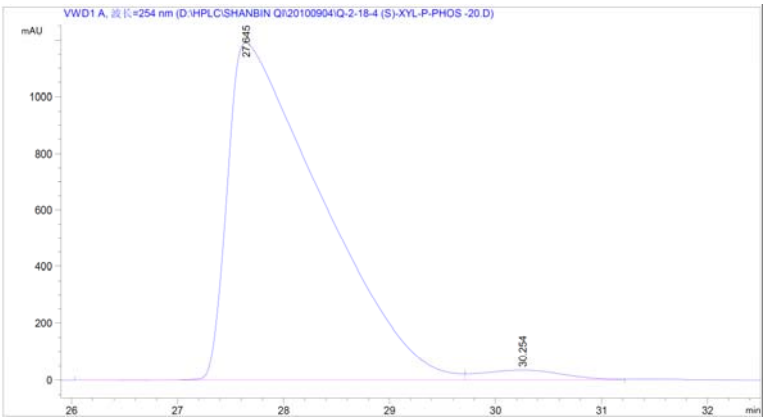

| Peak # | RetTime (min) | Width (min) | Area (mAU*S) | Height (mAU) | Area (%) |
|--------|---------------|-------------|--------------|--------------|----------|
| 1      | 27.645 BV     | 0.8876      | 7.34051e4    | 1191.62915   | 97.4563  |
| 2      | 30.254 VV     | 0.8370      | 1915.91870   | 34.97850     | 2.5437   |

(-)-Cyclohexyl(*p*-tolyl)methanol (4g)

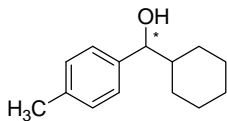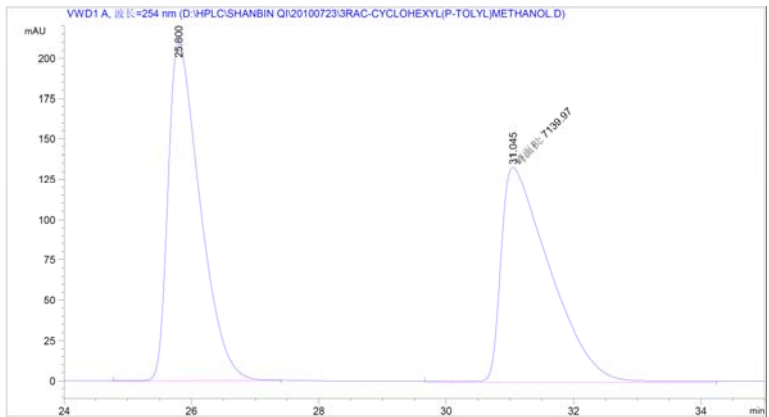

| Peak # | RetTime (min) | Width (min) | Area (mAU*S) | Height (mAU) | Area (%) |
|--------|---------------|-------------|--------------|--------------|----------|
| 1      | 25.800 BB     | 0.5307      | 7336.91406   | 209.60869    | 50.6802  |
| 2      | 31.045 MM     | 0.8918      | 7139.97412   | 133.44395    | 49.3198  |

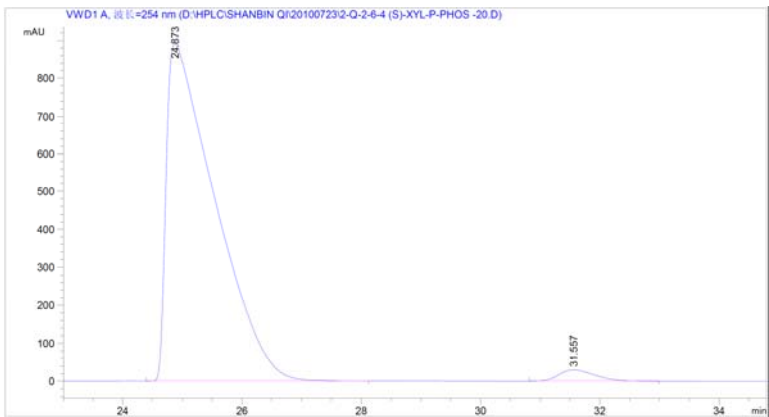

| Peak # | RetTime (min) | Width (min) | Area (mAU*S) | Height (mAU) | Area (%) |
|--------|---------------|-------------|--------------|--------------|----------|
| 1      | 24.873 VB     | 0.8194      | 5.05377e4    | 890.43054    | 97.6056  |
| 2      | 31.557 BB     | 0.6516      | 1239.75549   | 29.60816     | 2.3944   |

(-)-Cyclohexyl(4-(phenyl)phenyl)methanol (4h)

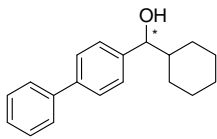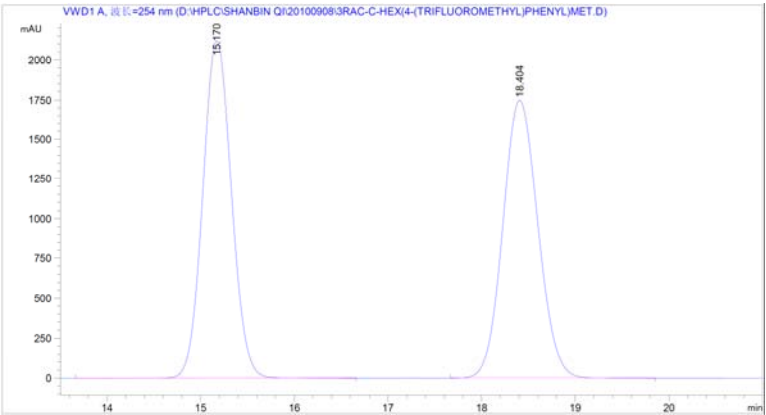

| Peak # | RetTime (min) | Width (min) | Area (mAU*S) | Height (mAU) | Area (%) |
|--------|---------------|-------------|--------------|--------------|----------|
| 1      | 15.170 VB     | 0.3322      | 4.50519e4    | 2121.70435   | 49.8163  |
| 2      | 18.404 BB     | 0.4047      | 4.53841e4    | 1748.72974   | 50.1837  |

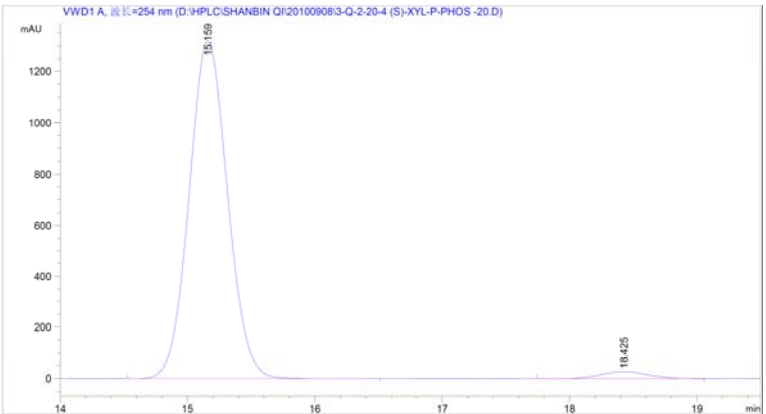

| Peak # | RetTime (min) | Width (min) | Area (mAU*S) | Height (mAU) | Area (%) |
|--------|---------------|-------------|--------------|--------------|----------|
| 1      | 15.159 VB     | 0.3258      | 2.76612e4    | 1320.96924   | 97.6370  |
| 2      | 18.425 VV     | 0.4003      | 669.46423    | 26.17454     | 2.3630   |

(–)-Cyclohexyl(3,5-dimethoxyphenyl)methanol (4i)

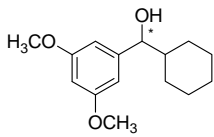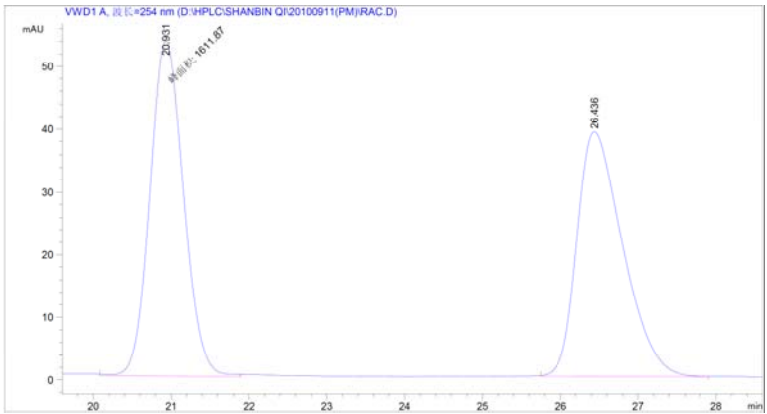

| Peak # | RetTime (min) | Width (min) | Area (mAU*S) | Height (mAU) | Area (%) |
|--------|---------------|-------------|--------------|--------------|----------|
| 1      | 20.931 MM     | 0.5012      | 1611.87268   | 53.59515     | 50.1141  |
| 2      | 26.436 BB     | 0.6308      | 1604.53149   | 39.04698     | 49.8859  |

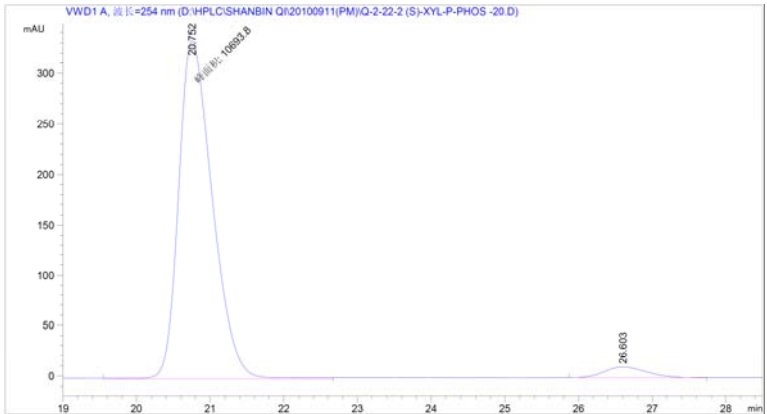

| Peak # | RetTime (min) | Width (min) | Area (mAU*S) | Height (mAU) | Area (%) |
|--------|---------------|-------------|--------------|--------------|----------|
| 1      | 20.752 MM     | 0.5316      | 1.06938e4    | 335.28653    | 96.1808  |
| 2      | 26.603 BB     | 0.6176      | 424.63034    | 10.62713     | 3.8192   |

(-)-Cyclohexyl(2-thienyl)methanol (5a)

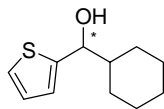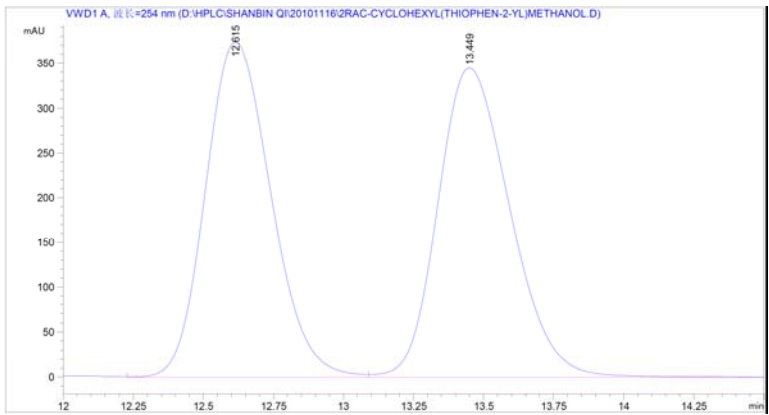

| Peak # | RetTime (min) | Width (min) | Area (mAU*S) | Height (mAU) | Area (%)  |         |
|--------|---------------|-------------|--------------|--------------|-----------|---------|
| 1      | 12.615        | VV          | 0.2536       | 6074.19434   | 373.95813 | 49.5407 |
| 2      | 13.449        | VB          | 0.2820       | 6186.83252   | 344.97693 | 50.4593 |

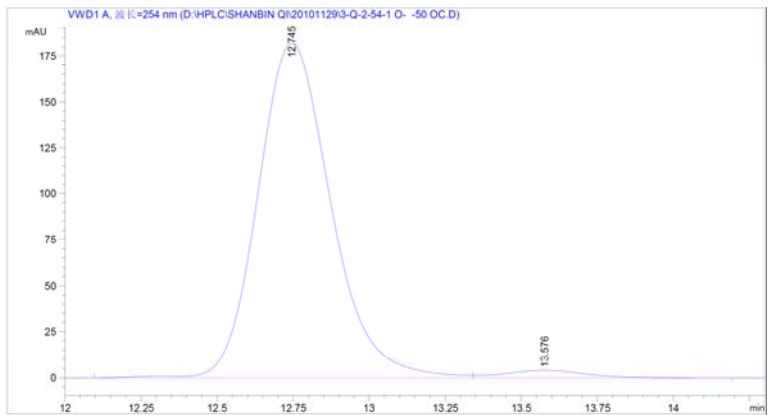

| Peak # | RetTime (min) | Width (min) | Area (mAU*S) | Height (mAU) | Area (%) |
|--------|---------------|-------------|--------------|--------------|----------|
| 1      | 12.745 BV     | 0.2587      | 3042.82812   | 182.37236    | 97.4679  |
| 2      | 13.576 VB     | 0.2875      | 79.04890     | 4.12682      | 2.5321   |



(-)-Cyclohexyl(3-thienyl)methanol (5b)

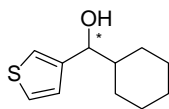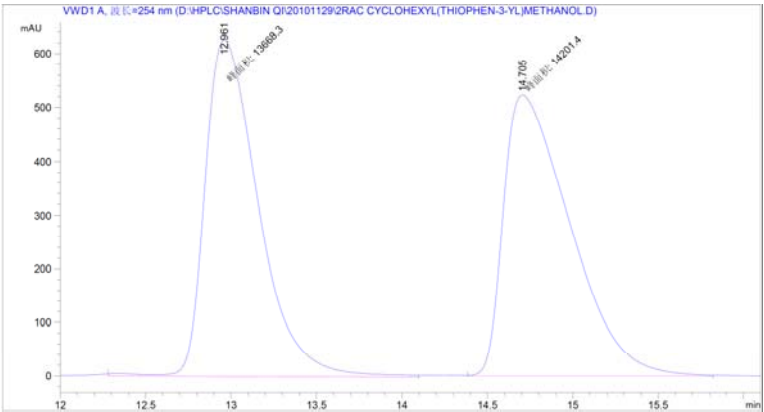

| Peak # | RetTime (min) | Width (min) | Area (mAU*S) | Height (mAU) | Area (%) |
|--------|---------------|-------------|--------------|--------------|----------|
| 1      | 12.961 MM     | 0.3631      | 1.36683e4    | 627.32159    | 49.0435  |
| 2      | 14.705 MM     | 0.4518      | 1.42014e4    | 523.87451    | 50.9565  |

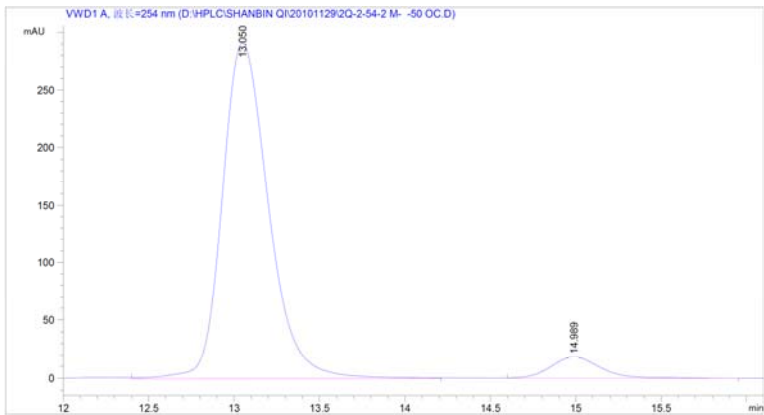

| Peak # | RetTime (min) | Width (min) | Area (mAU*S) | Height (mAU) | Area (%) |
|--------|---------------|-------------|--------------|--------------|----------|
| 1      | 13.050 VB     | 0.2890      | 5479.86670   | 291.71954    | 93.6017  |
| 2      | 14.989 BB     | 0.3128      | 374.58762    | 18.43355     | 6.3983   |

(S)-Cyclohexyl(2-furyl)methanol (5c)

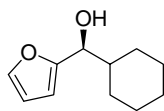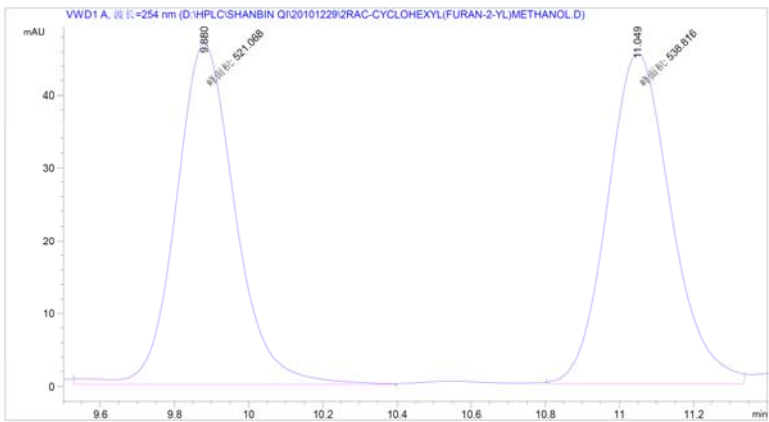

| Peak # | RetTime (min) | Width (min) | Area (mAU*S) | Height (mAU) | Area (%) |
|--------|---------------|-------------|--------------|--------------|----------|
| 1      | 9.880 MM      | 0.1850      | 521.06787    | 46.95217     | 49.1627  |
| 2      | 11.049 MM     | 0.1972      | 538.81598    | 45.54922     | 50.8373  |

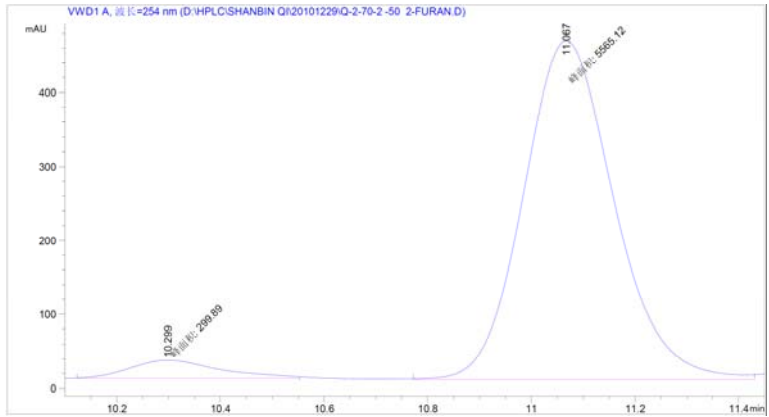

| Peak # | RetTime (min) | Width (min) | Area (mAU*S) | Height (mAU) | Area (%) |
|--------|---------------|-------------|--------------|--------------|----------|
| 1      | 10.299 MM     | 0.2013      | 299.88989    | 24.82388     | 5.1132   |
| 2      | 11.067 MM     | 0.2021      | 5565.12109   | 459.00873    | 94.8868  |

(+)-Benzo[b]2-thienyl(cyclohexyl)methanol (5d)

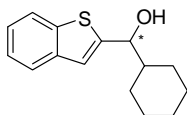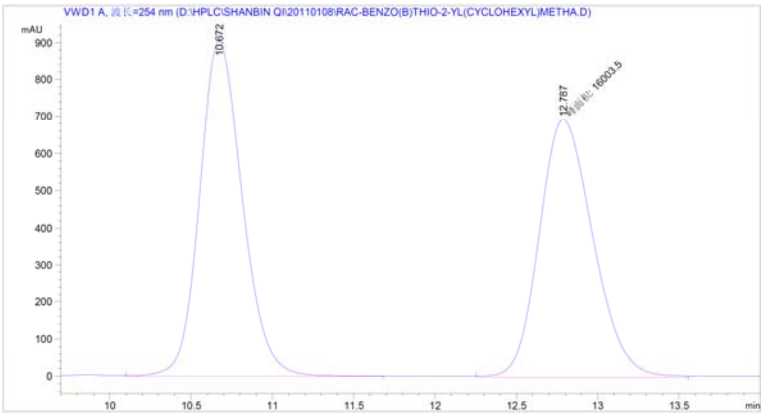

| Peak # | RetTime (min) | Width (min) | Area (mAU*S) | Height (mAU) | Area (%) |
|--------|---------------|-------------|--------------|--------------|----------|
| 1      | 10.672 VB     | 0.2838      | 1.65954e4    | 905.06720    | 50.9079  |
| 2      | 12.787 MM     | 0.3842      | 1.60035e4    | 694.18597    | 49.0921  |

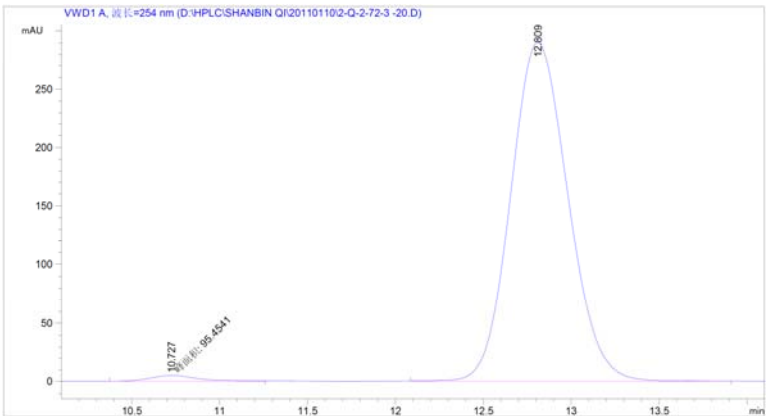

| Peak # | RetTime (min) | Width (min) | Area (mAU*S) | Height (mAU) | Area (%) |
|--------|---------------|-------------|--------------|--------------|----------|
| 1      | 10.727 MM     | 0.3203      | 95.45409     | 4.96759      | 1.4326   |
| 2      | 12.809 BB     | 0.3512      | 6567.76270   | 290.43332    | 98.5674  |

(-)-Cyclohexyl(2-pyridyl)methanol (5e)

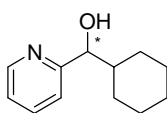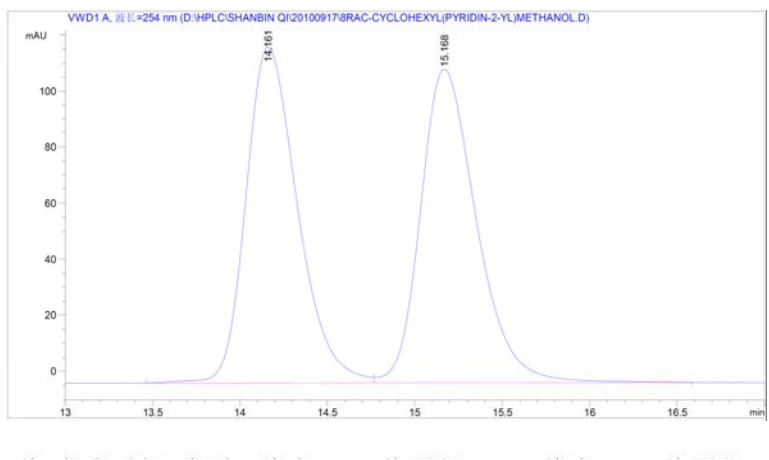

| Peak # | RetTime (min) | Width (min) | Area (mAU*S) | Height (mAU) | Area (%) |
|--------|---------------|-------------|--------------|--------------|----------|
| 1      | 14.161 BV     | 0.3182      | 2461.02441   | 119.85679    | 49.6651  |
| 2      | 15.168 VB     | 0.3417      | 2494.21948   | 111.86796    | 50.3349  |

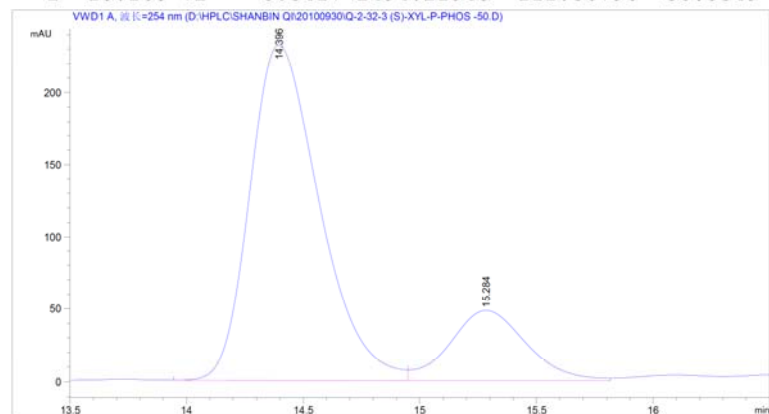

| Peak # | RetTime (min) | Width (min) | Area (mAU*S) | Height (mAU) | Area (%) |
|--------|---------------|-------------|--------------|--------------|----------|
| 1      | 14.396 VV     | 0.3202      | 4804.89111   | 232.02953    | 81.5287  |
| 2      | 15.284 VV     | 0.3460      | 1088.60400   | 48.01913     | 18.4713  |

(–)-Cyclohexyl(3-pyridyl)methanol (5f)

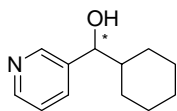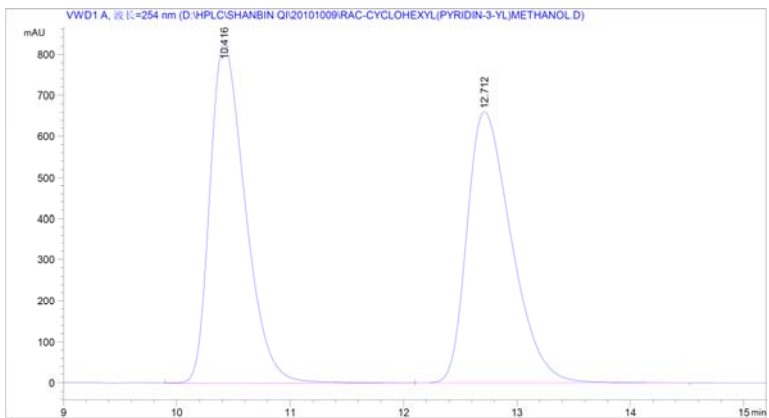

| Peak # | RetTime (min) | Width (min) | Area (mAU*S) | Height (mAU) | Area (%)  |         |
|--------|---------------|-------------|--------------|--------------|-----------|---------|
| 1      | 10.416        | VV          | 0.3356       | 1.79723e4    | 825.34625 | 50.0128 |
| 2      | 12.712        | VB          | 0.4187       | 1.79631e4    | 661.47058 | 49.9872 |

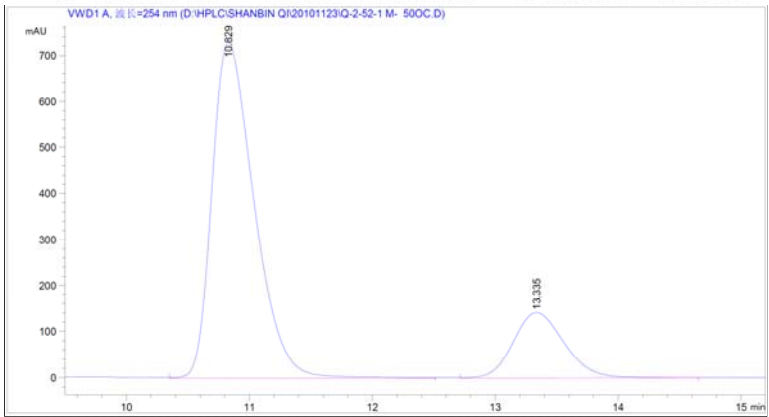

| Peak # | RetTime (min) | Width (min) | Area (mAU*S) | Height (mAU) | Area (%) |
|--------|---------------|-------------|--------------|--------------|----------|
| 1      | 10.829 VB     | 0.3655      | 1.73991e4    | 729.79065    | 80.9847  |
| 2      | 13.335 BB     | 0.4514      | 4085.32495   | 141.06160    | 19.0153  |

(-)-Cyclohexyl(4-pyridyl)methanol (5g)

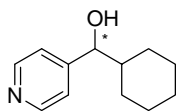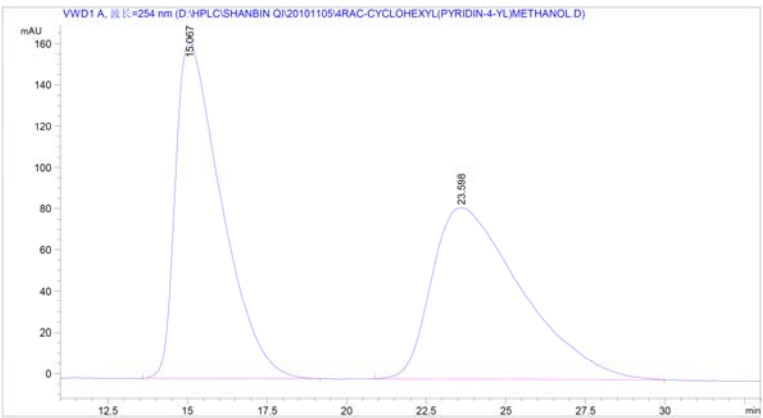

| Peak # | RetTime (min) | Width (min) | Area (mAU*S) | Height (mAU) | Area (%) |
|--------|---------------|-------------|--------------|--------------|----------|
| 1      | 15.067        | BB          | 1.63829e4    | 162.94002    | 50.0486  |
| 2      | 23.598        | BB          | 1.63511e4    | 82.97840     | 49.9514  |

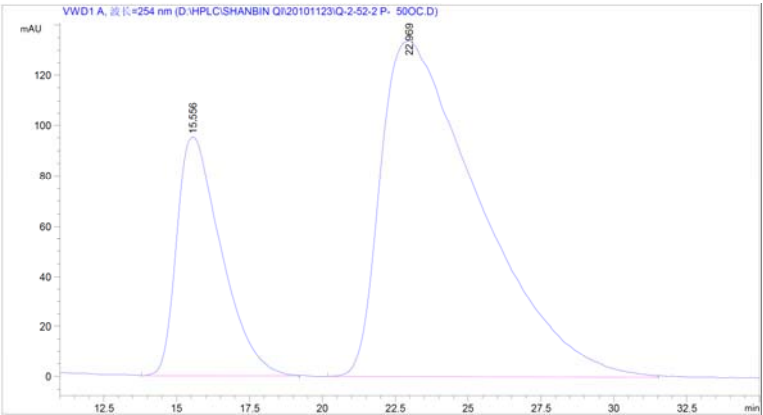

| Peak # | RetTime (min) | Width (min) | Area (mAU*S) | Height (mAU) | Area (%) |
|--------|---------------|-------------|--------------|--------------|----------|
| 1      | 15.556        | BB          | 1.01456e4    | 95.26300     | 24.2141  |
| 2      | 22.969        | BB          | 3.17538e4    | 134.09256    | 75.7859  |



**(S)-Cyclobutylphenylmethanol (3a)**

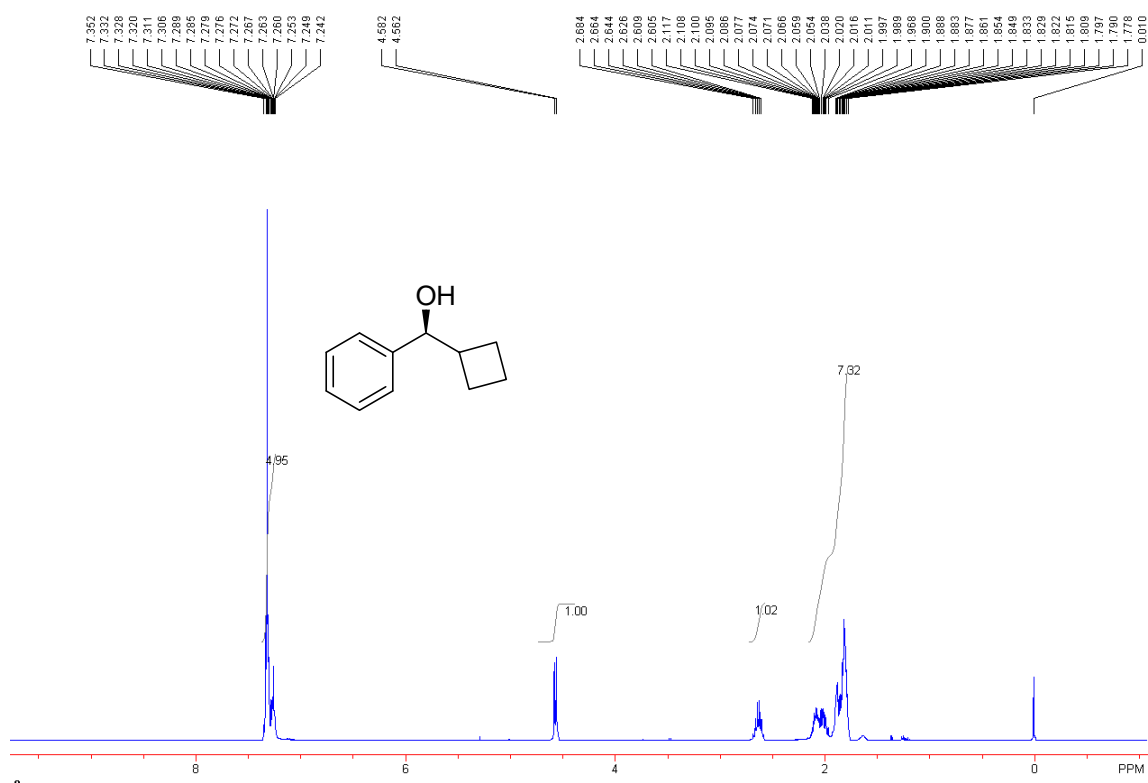

**(S)-Cyclohexylphenylmethanol (4a)**

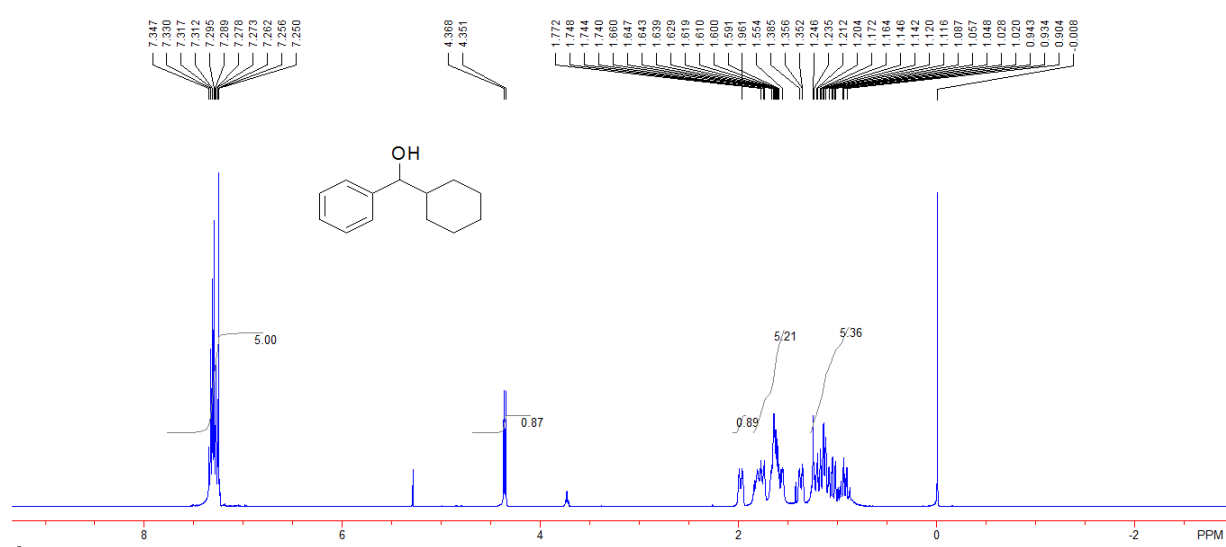



(-)-(2-Chlorophenyl)cyclopropylmethanol (2b)

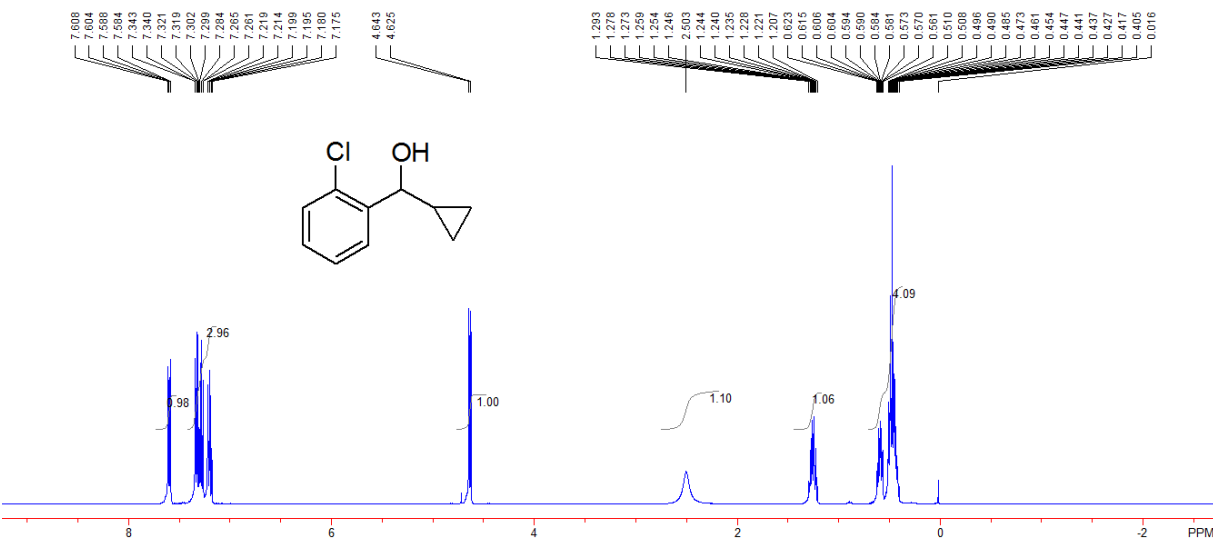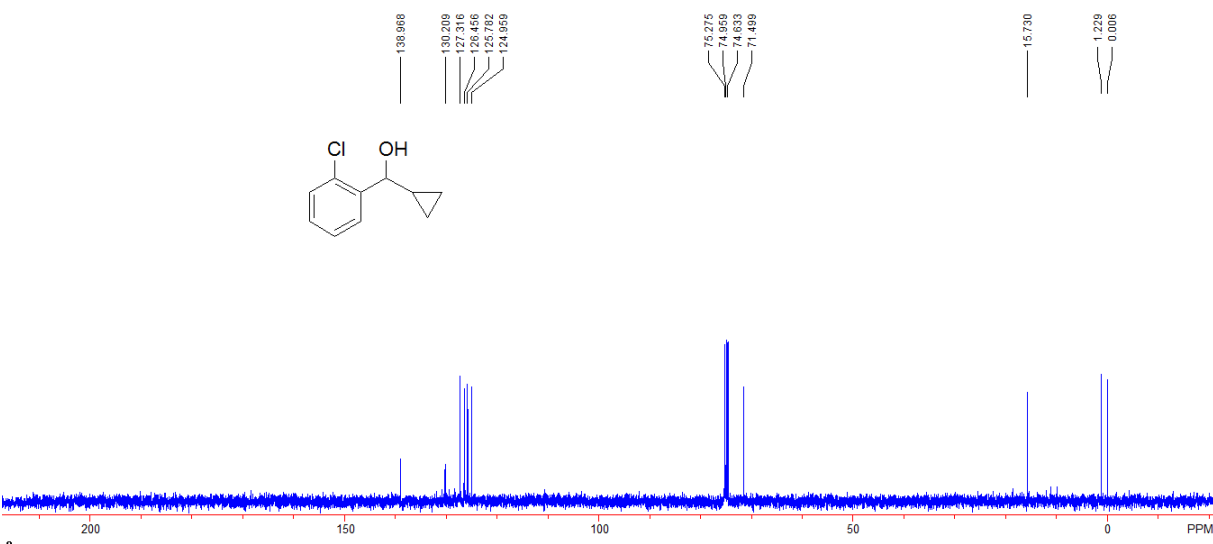



**(+)-Cyclopropyl (3-methoxyphenyl)methanol (2e)**

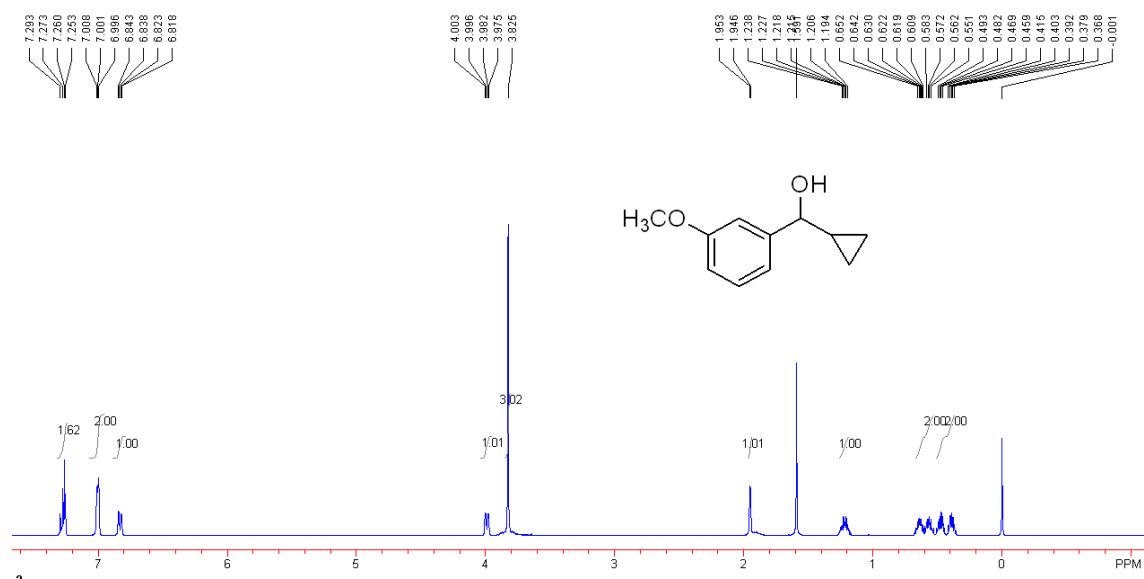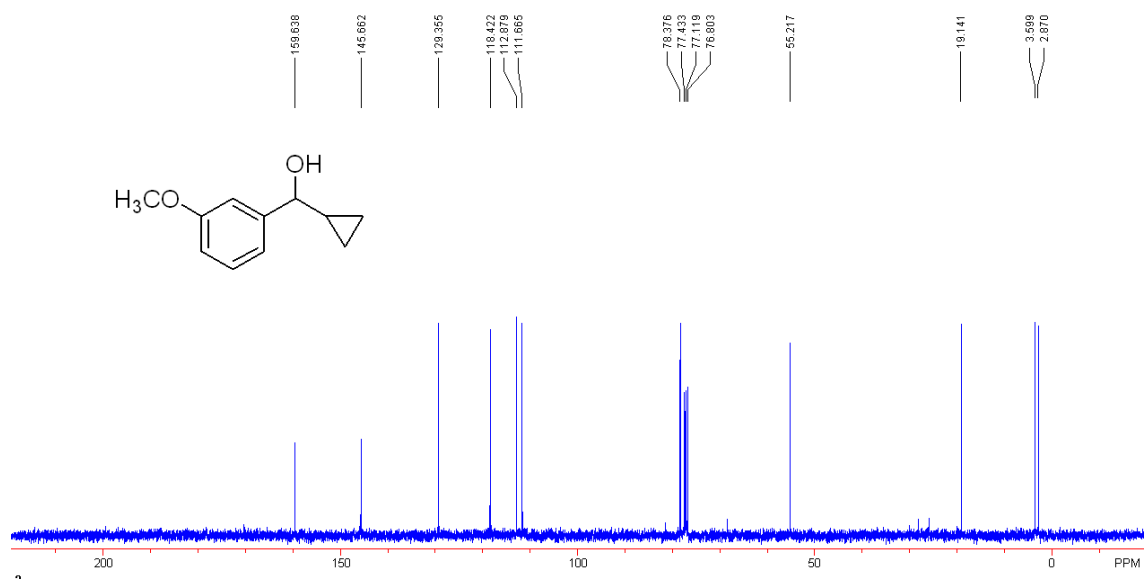

(+)-(4-Chlorophenyl)cyclopropylmethanol (2f)

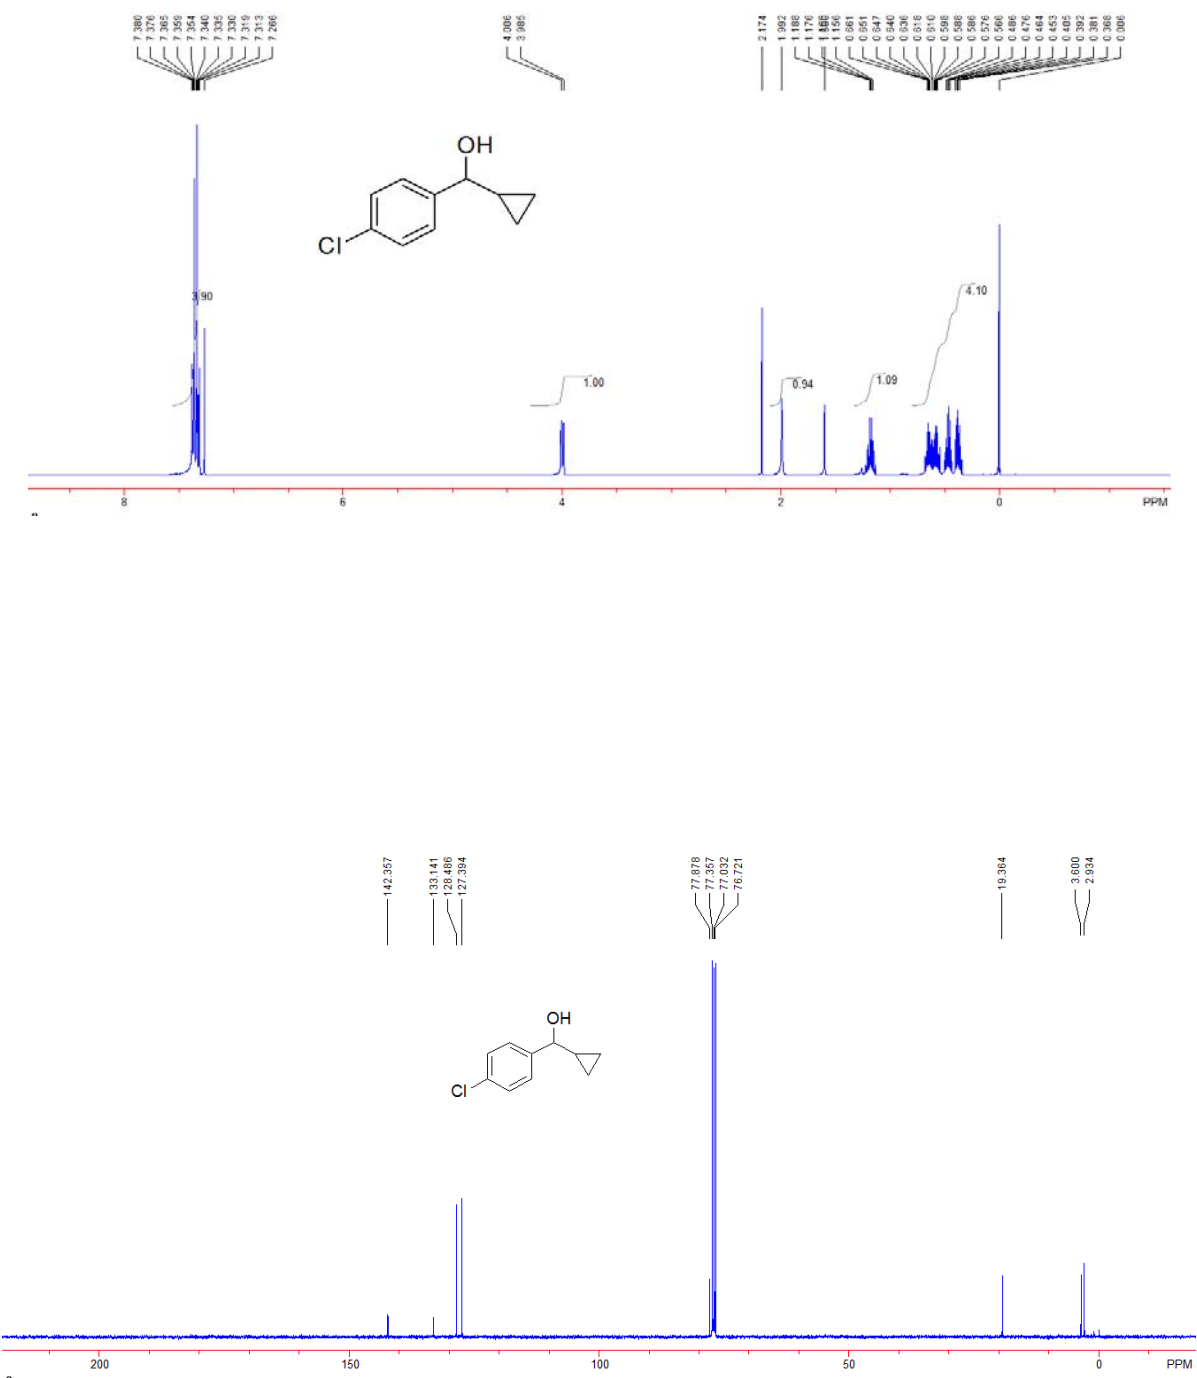

**(-)-(2-Chlorophenyl)cyclopentylmethanol (1b)**

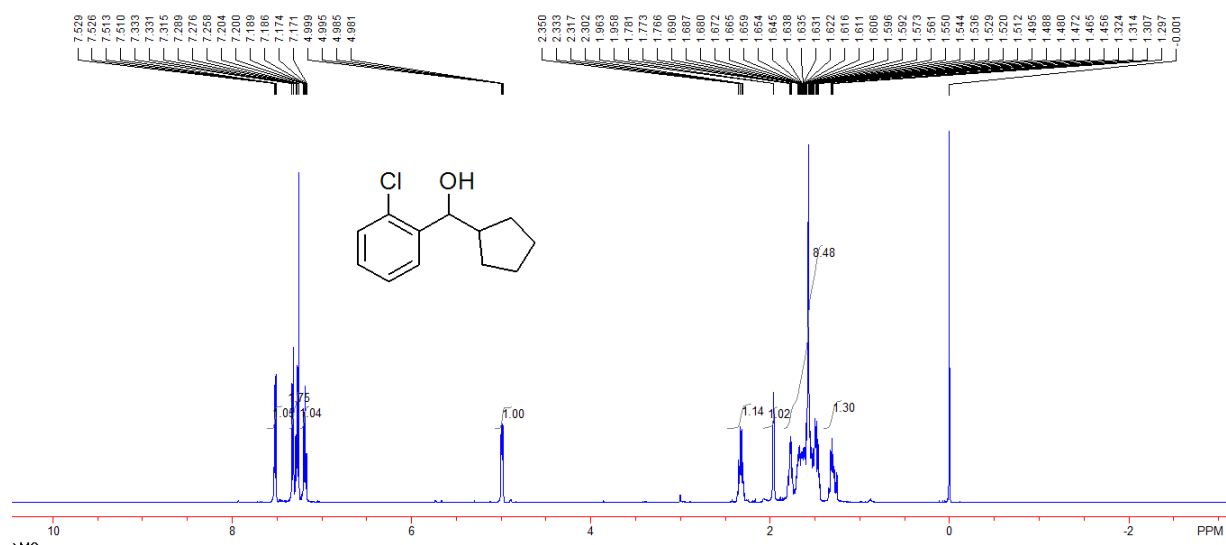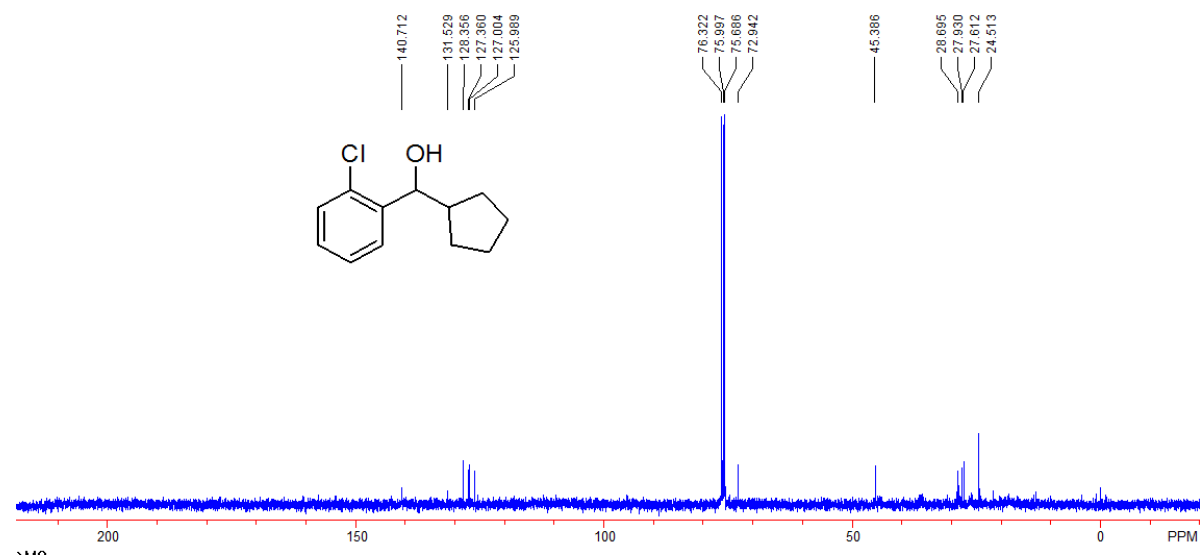

**(-)-Cyclopentyl(2-methoxyphenyl)methanol (1c)**

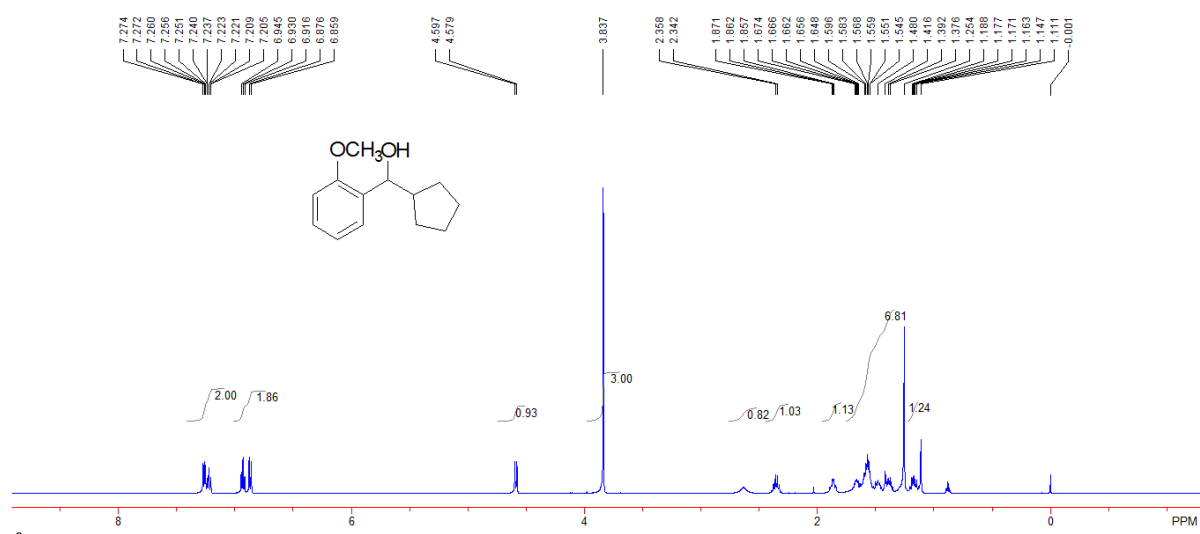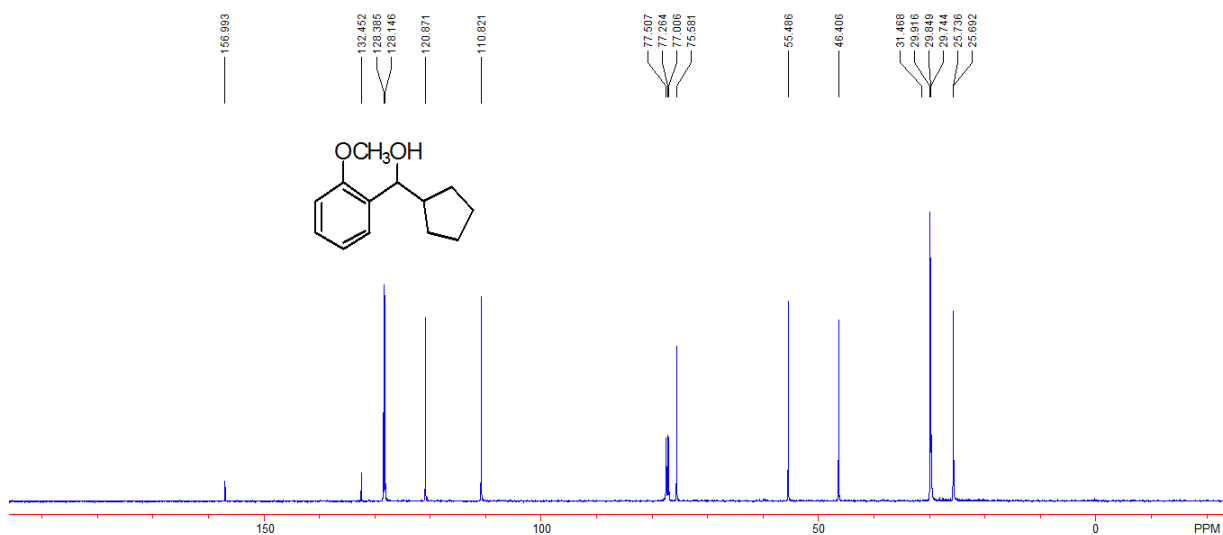

(-)-(3-Bromophenyl)cyclopentylmethanol (1d)

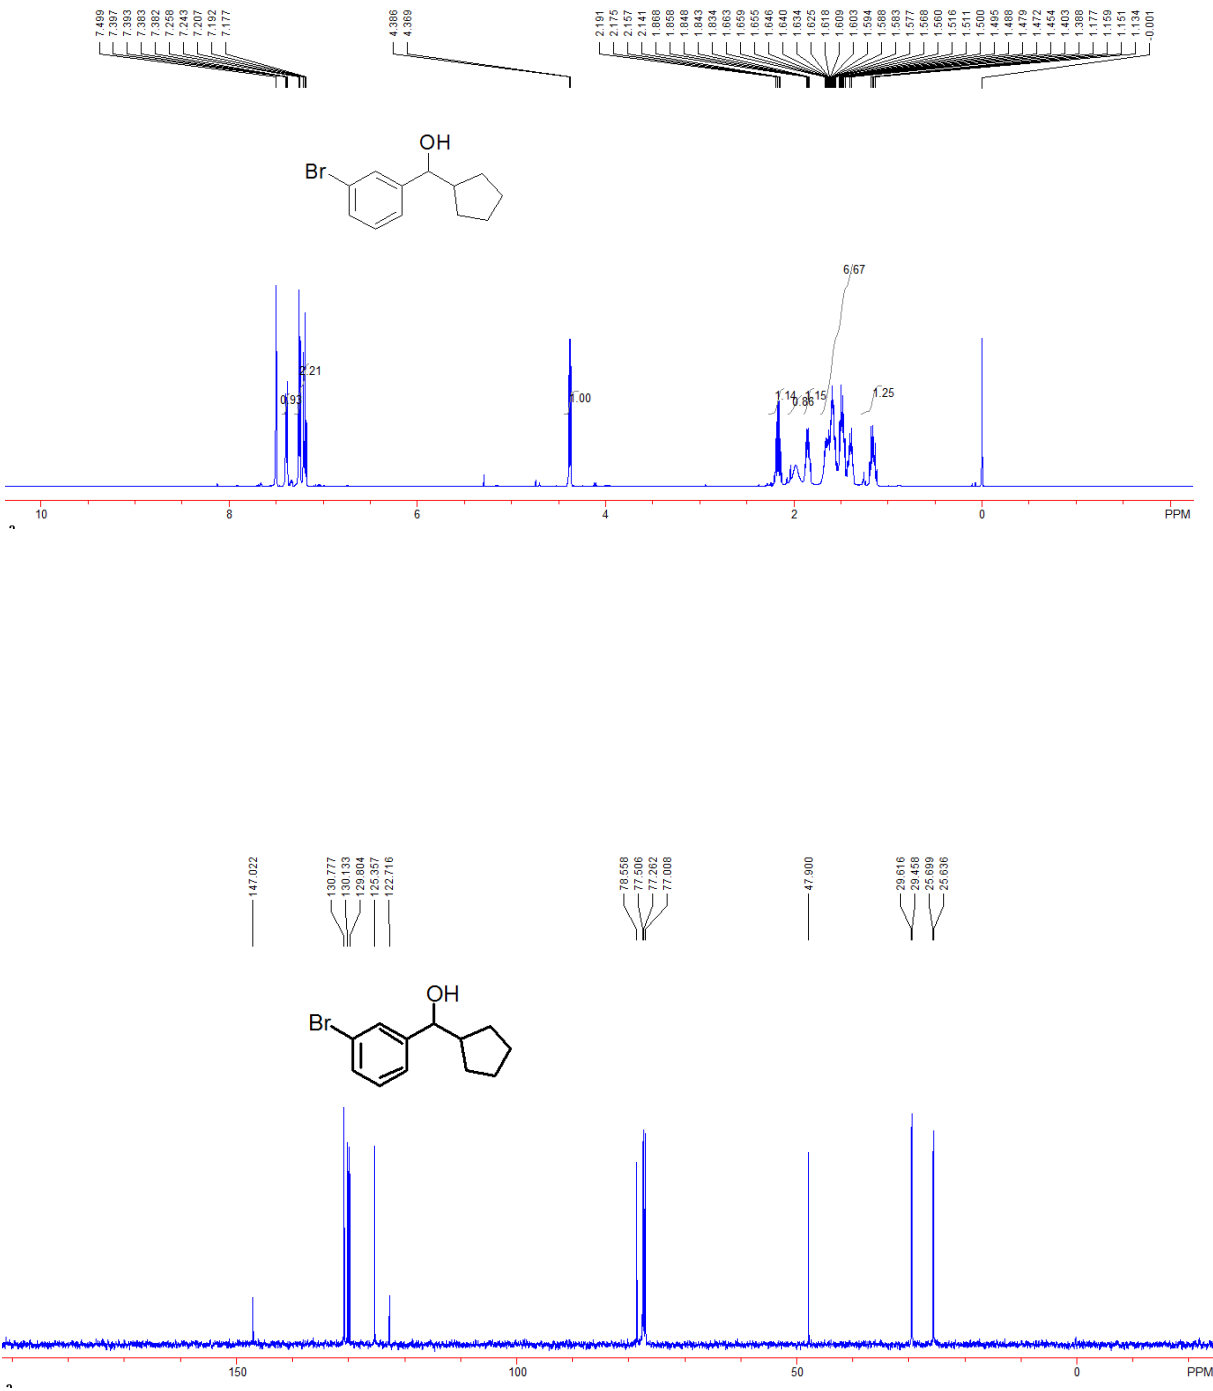

**(-)-Cyclopentyl(3-methoxyphenyl)methanol (1e)**

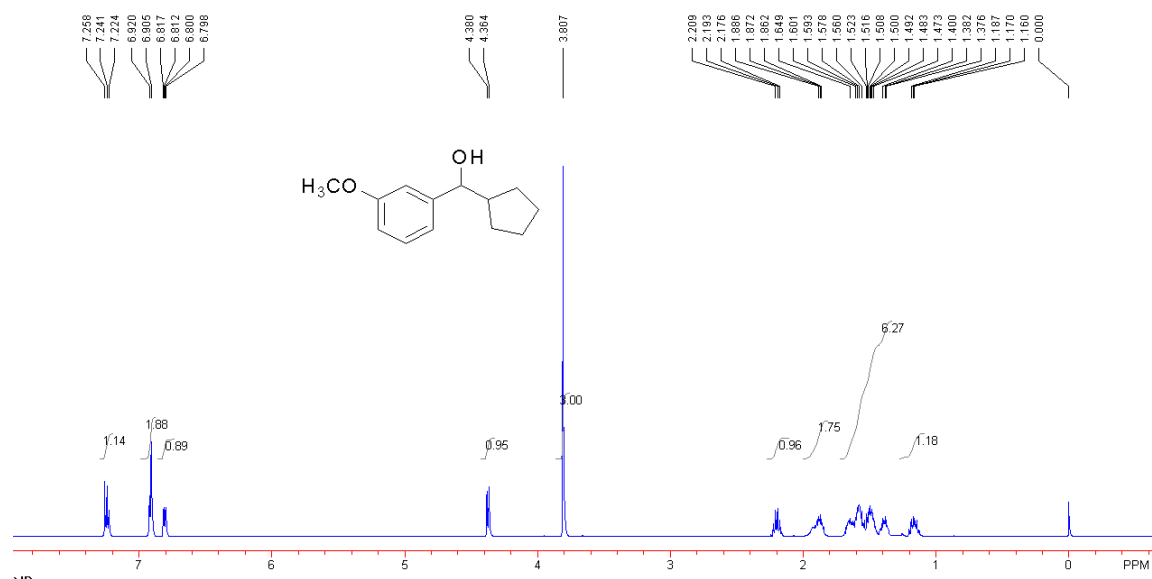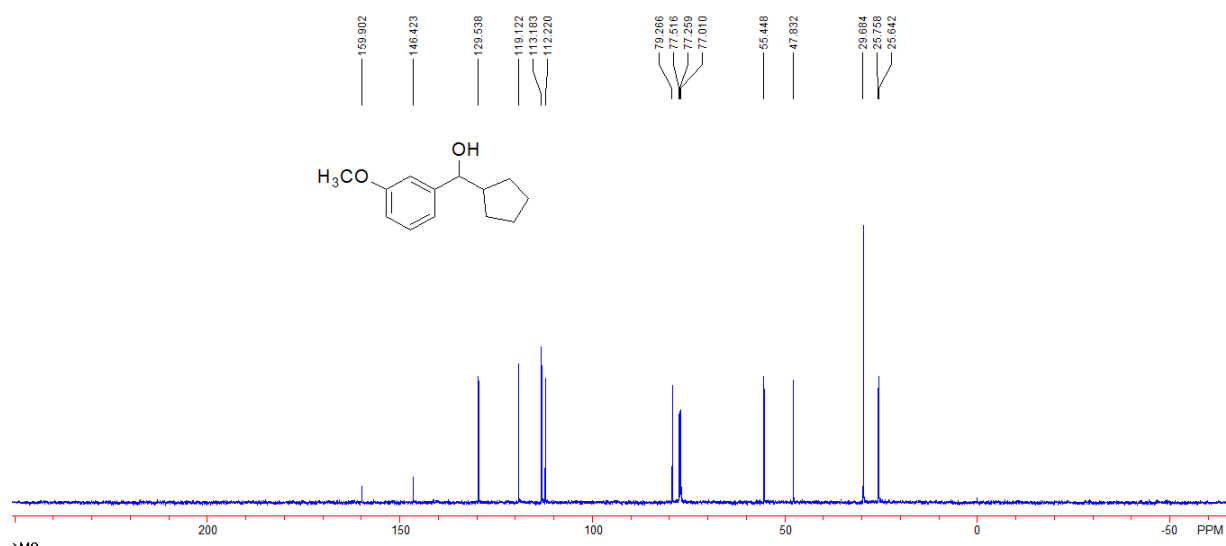



**(-)-Cyclopentyl(4-(trifluoromethyl)phenyl)methanol (1f)**

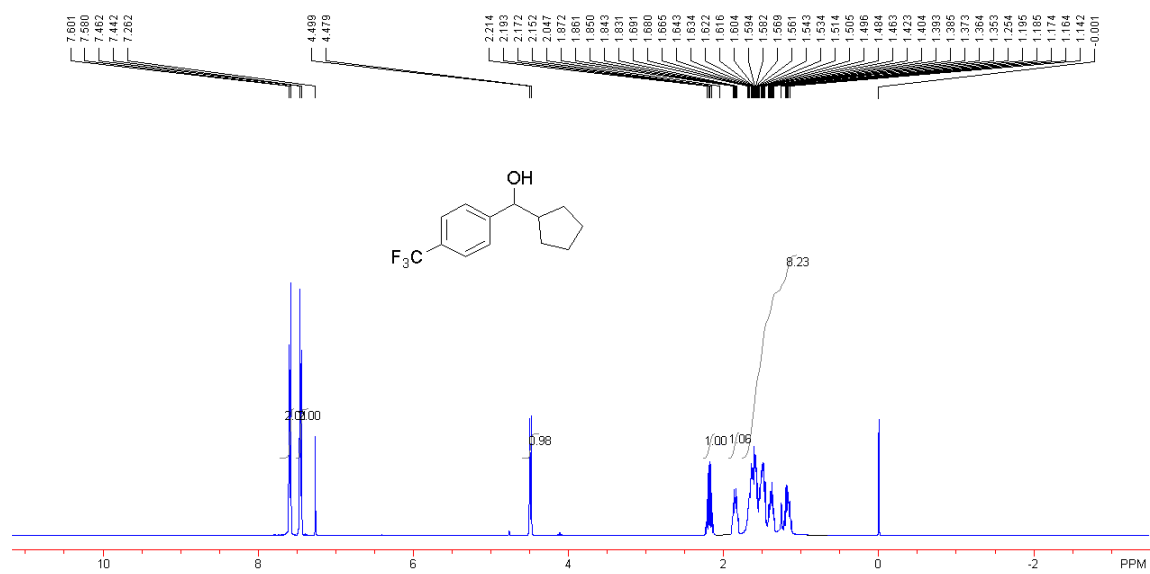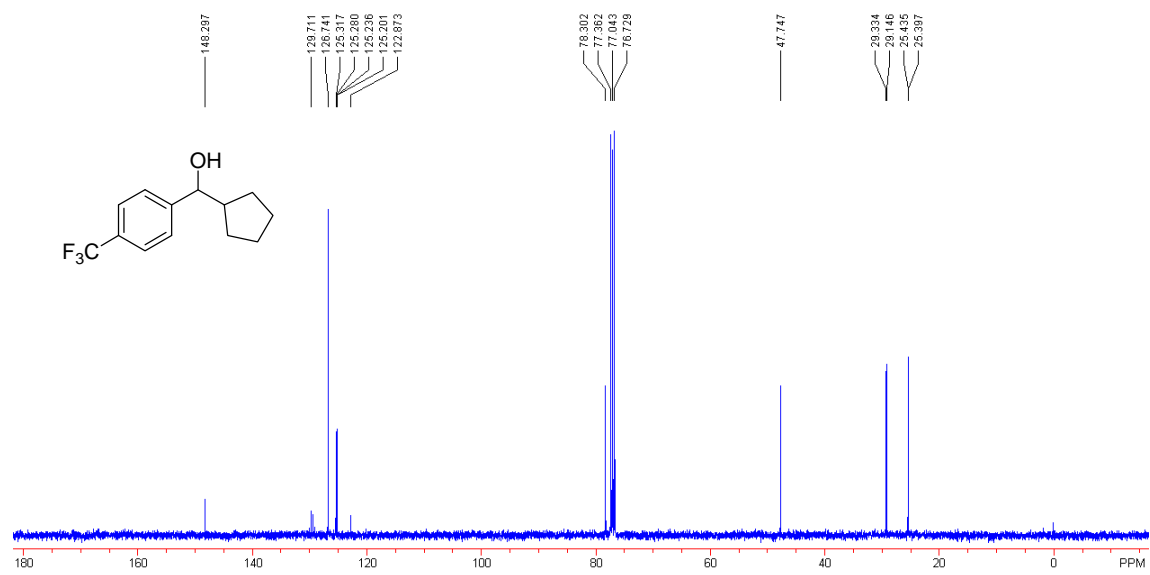

(-)-Cyclopentyl(*p*-tolyl)methanol (1g)

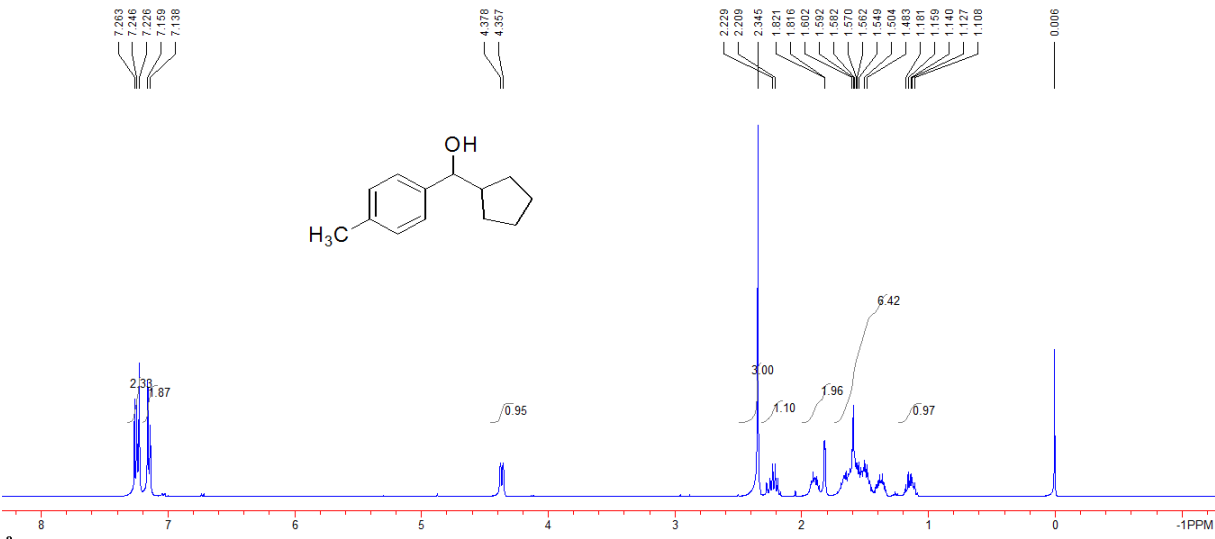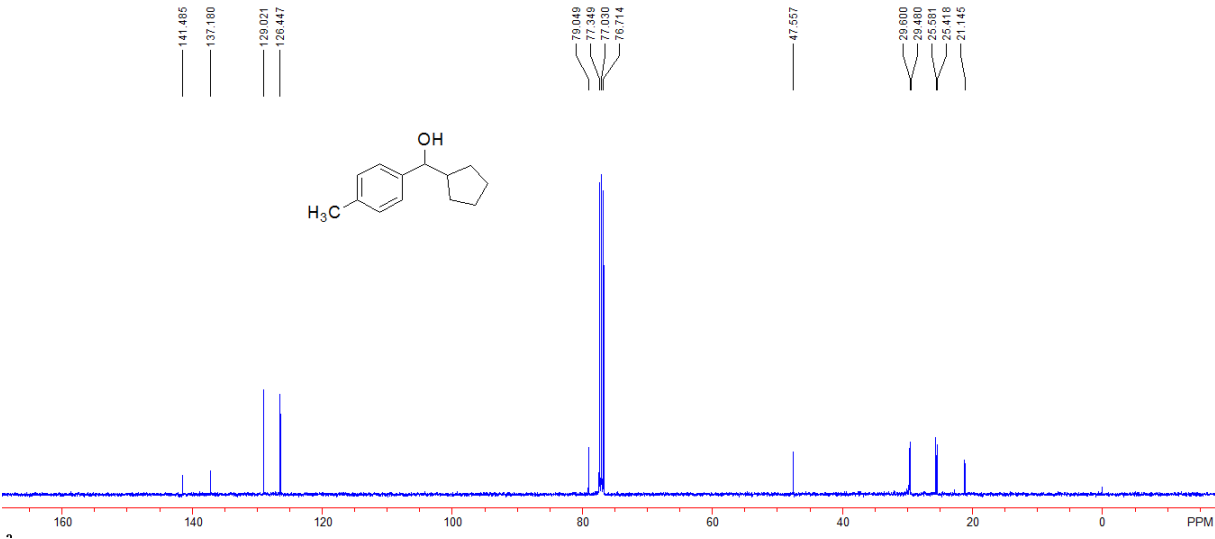

(-)-(2-Chlorophenyl)(cyclohexyl)methanol (4b)

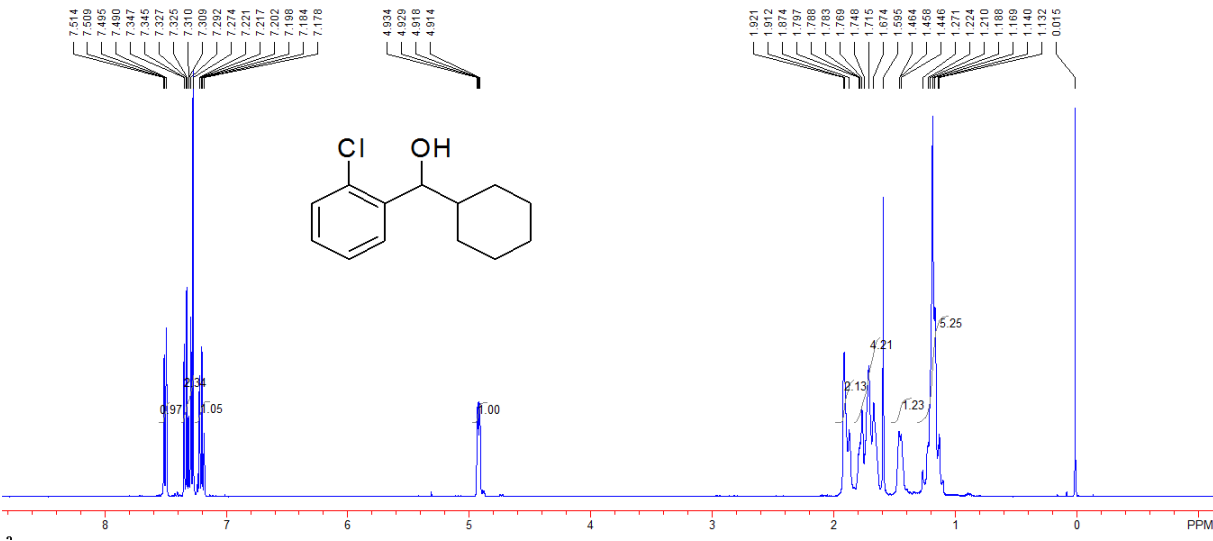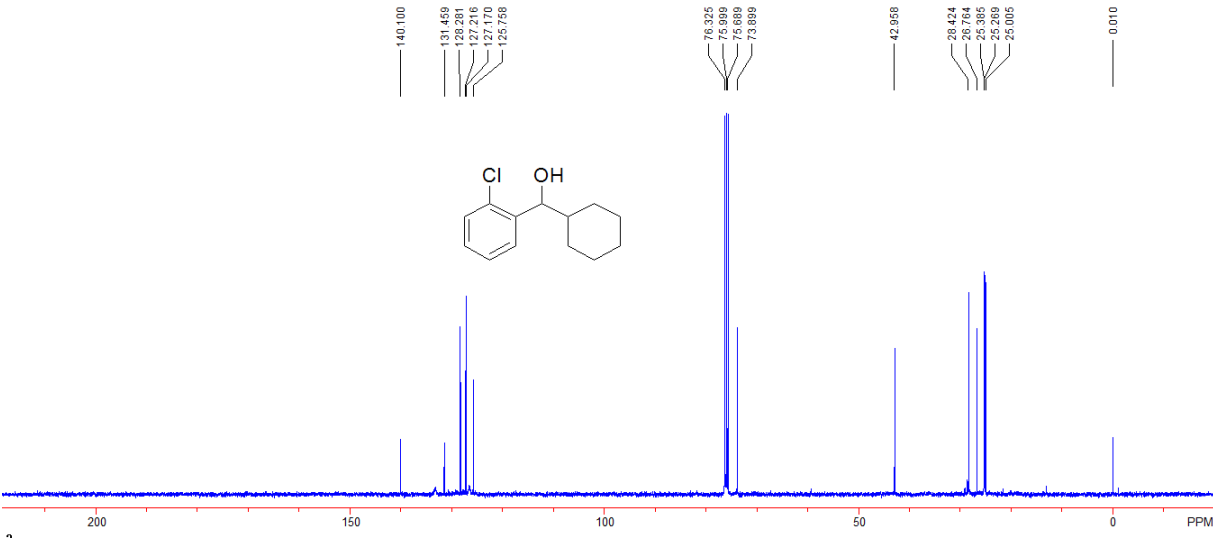

(-)-Cyclohexyl(*o*-tolyl)methanol (4c)

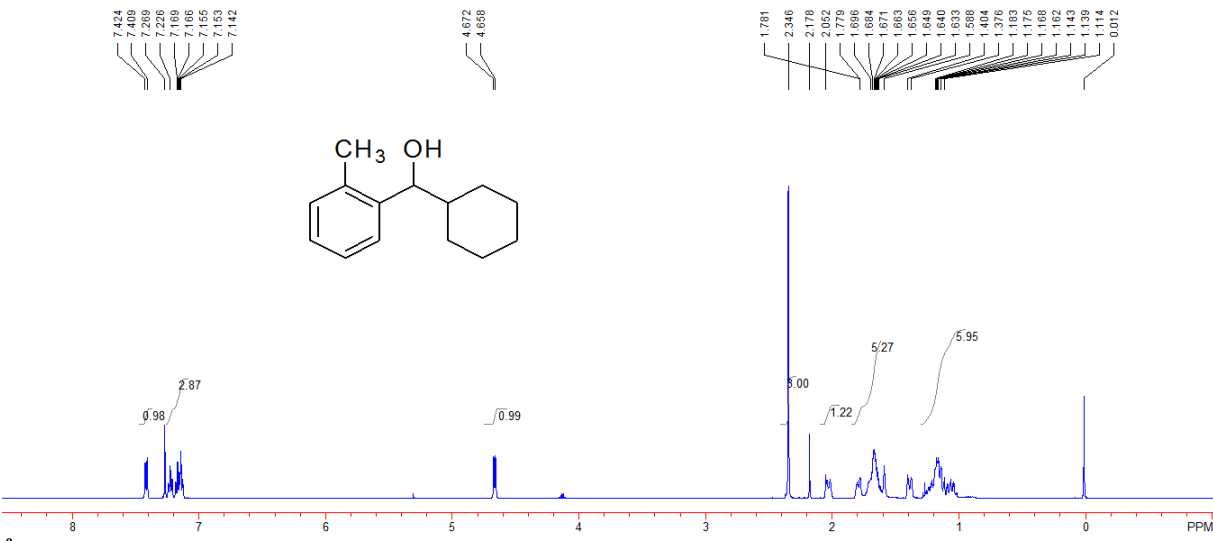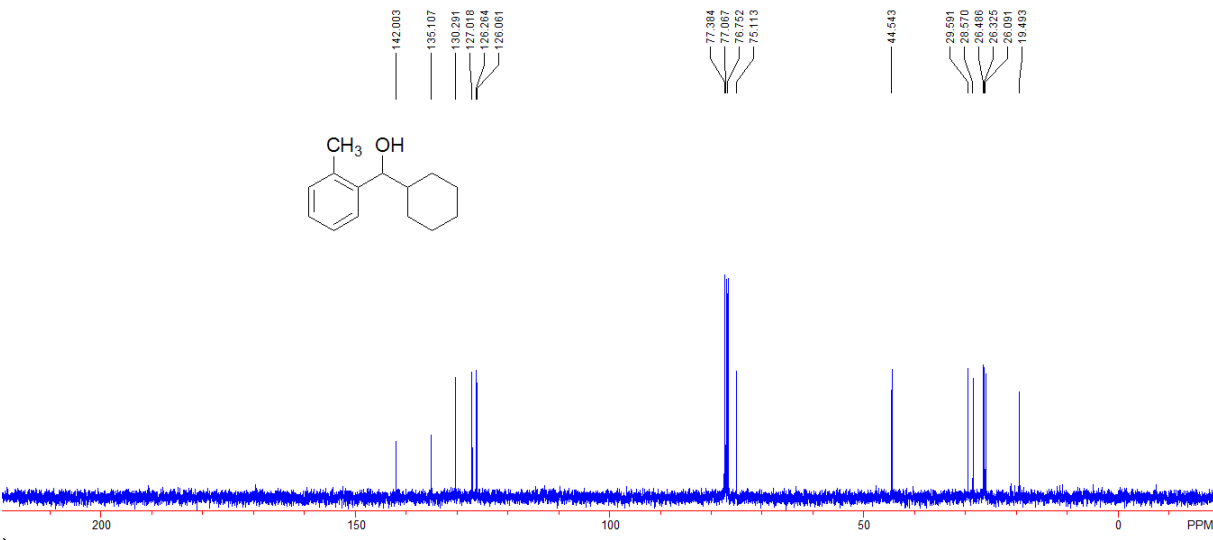

(-)-(3-Bromophenyl)cyclohexylmethanol (4d)

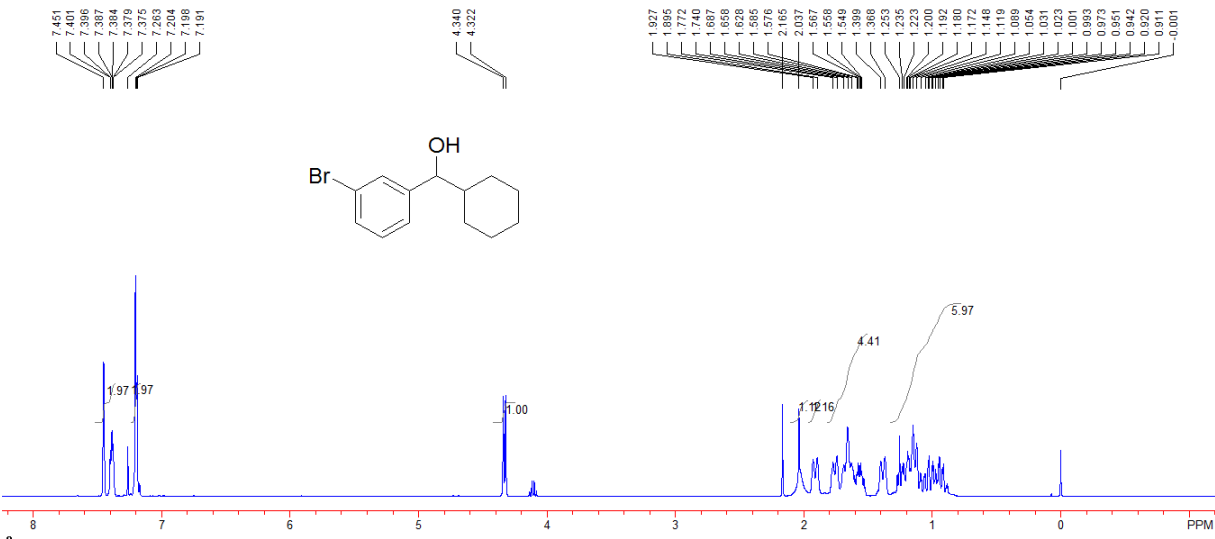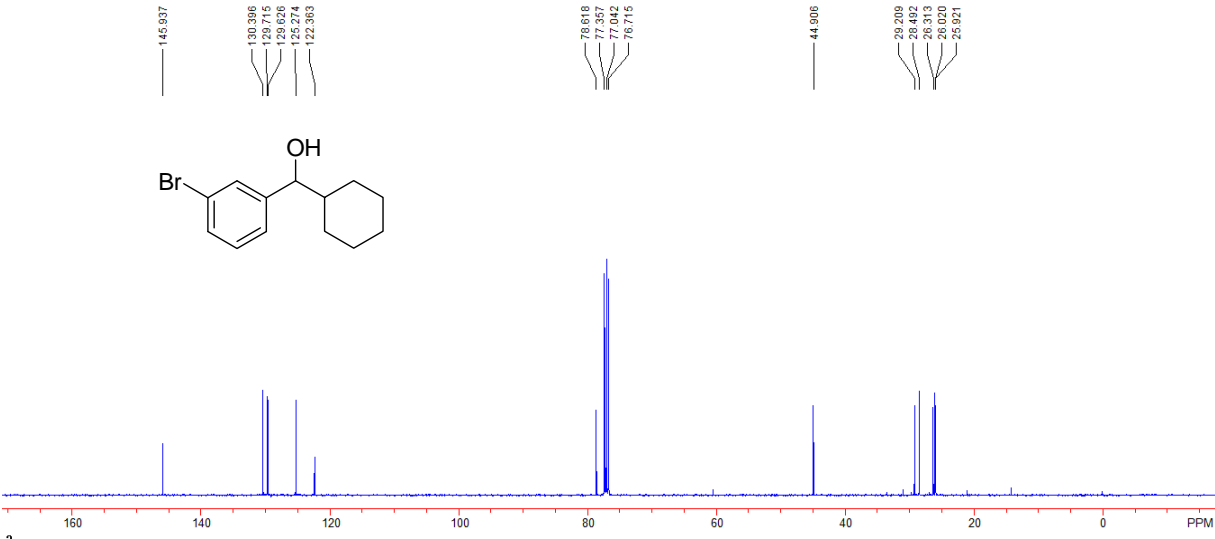

**(S)-Cyclohexyl(3-methoxyphenyl)methanol (4e)**

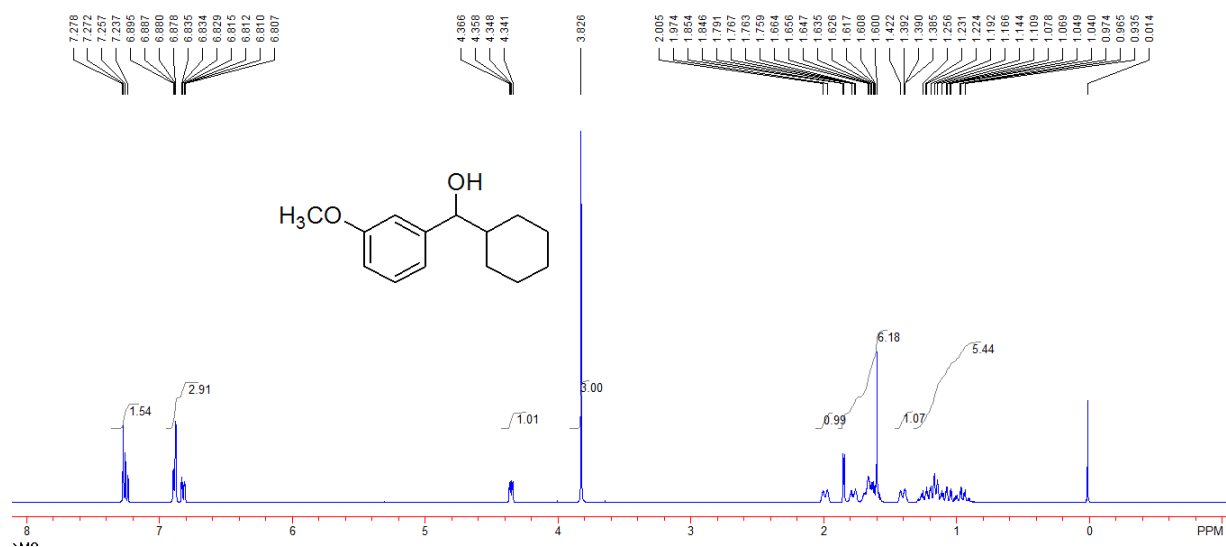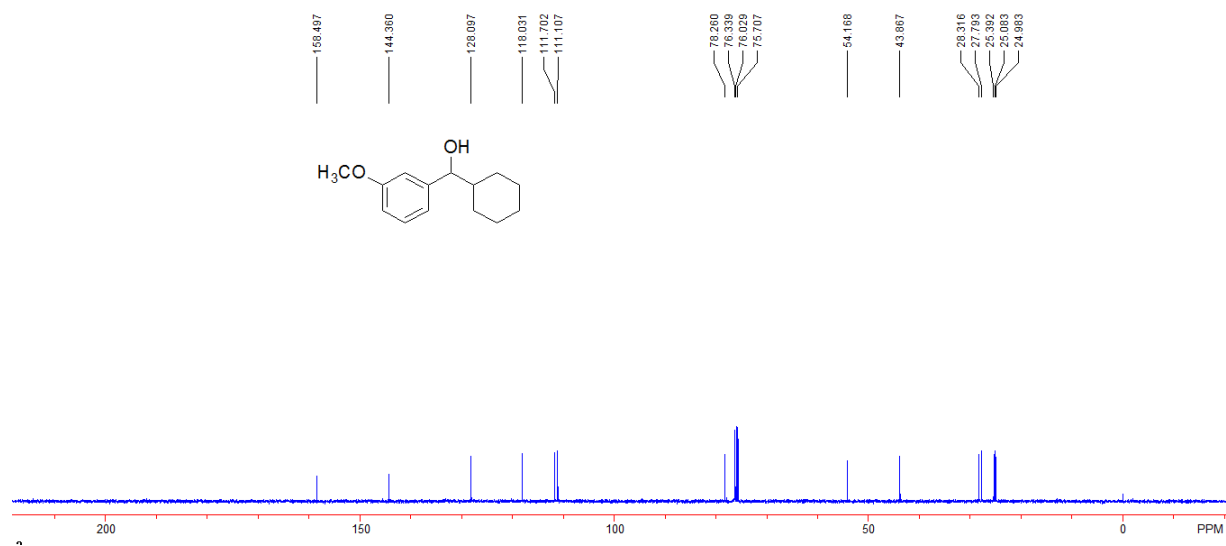

**(-)-Cyclohexyl(4-(trifluoromethyl)phenyl)methanol (4f)**

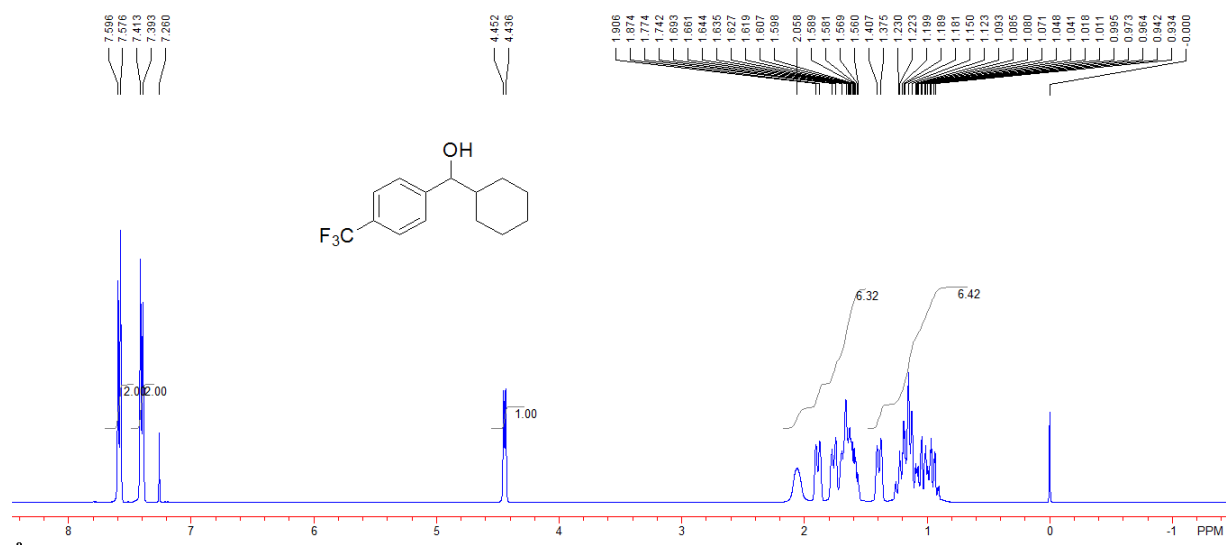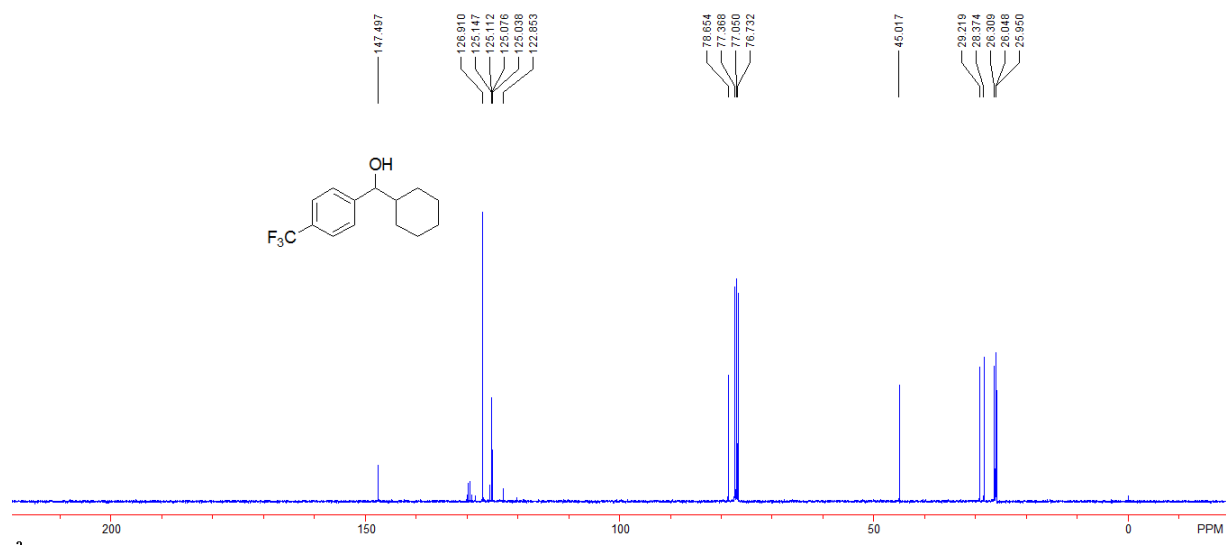

**(-)-Cyclohexyl(*p*-tolyl)methanol (4g)**

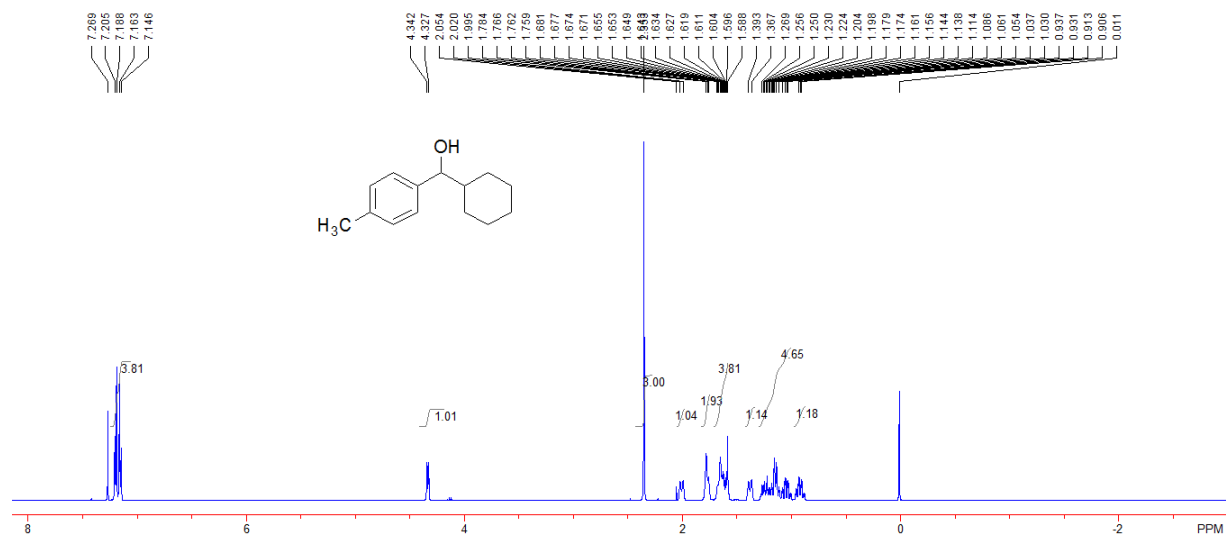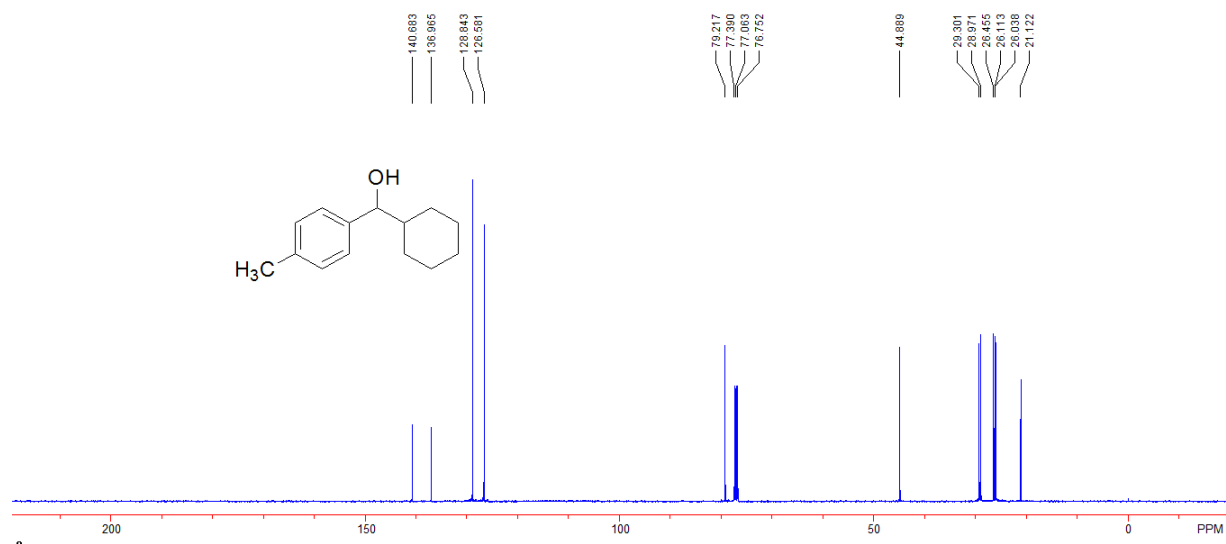



(-)-Cyclohexyl(4-(phenyl)phenyl)methanol (4h)

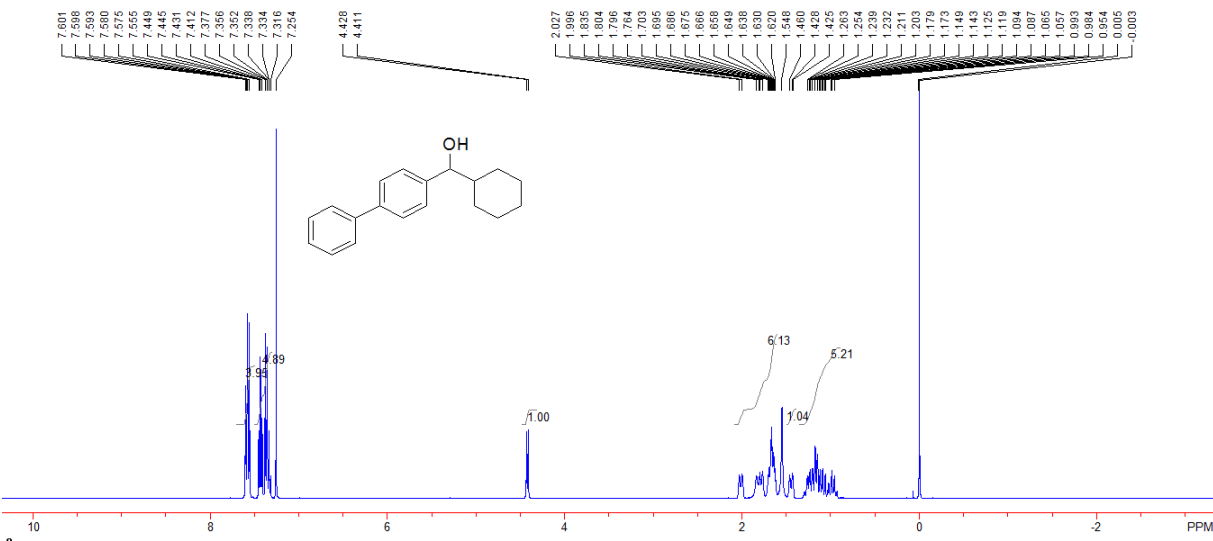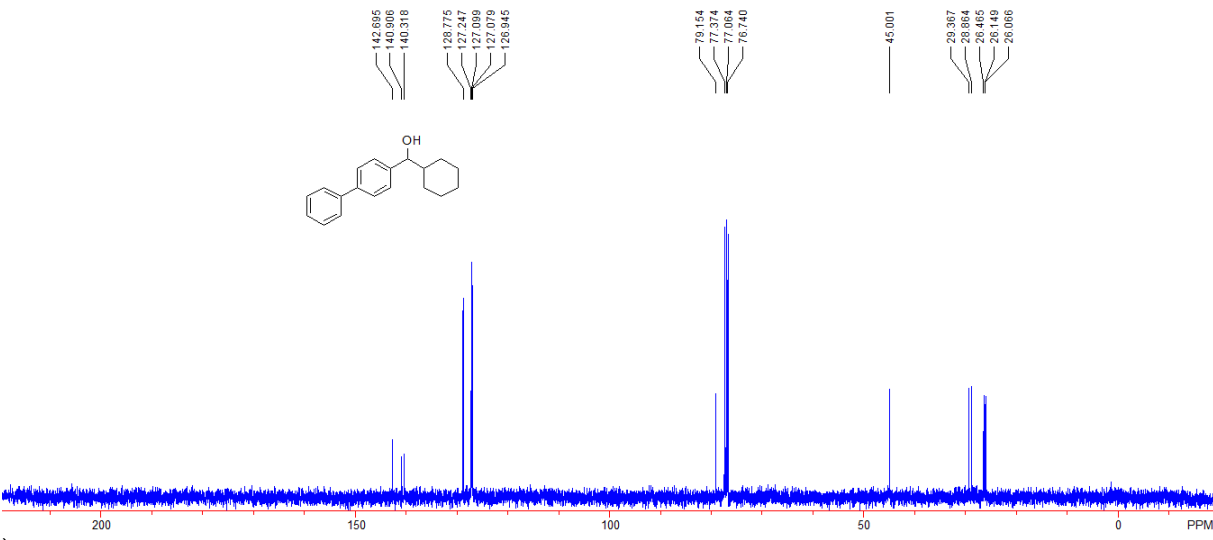

(–)-Cyclohexyl(3,5-dimethoxyphenyl)methanol (4i)

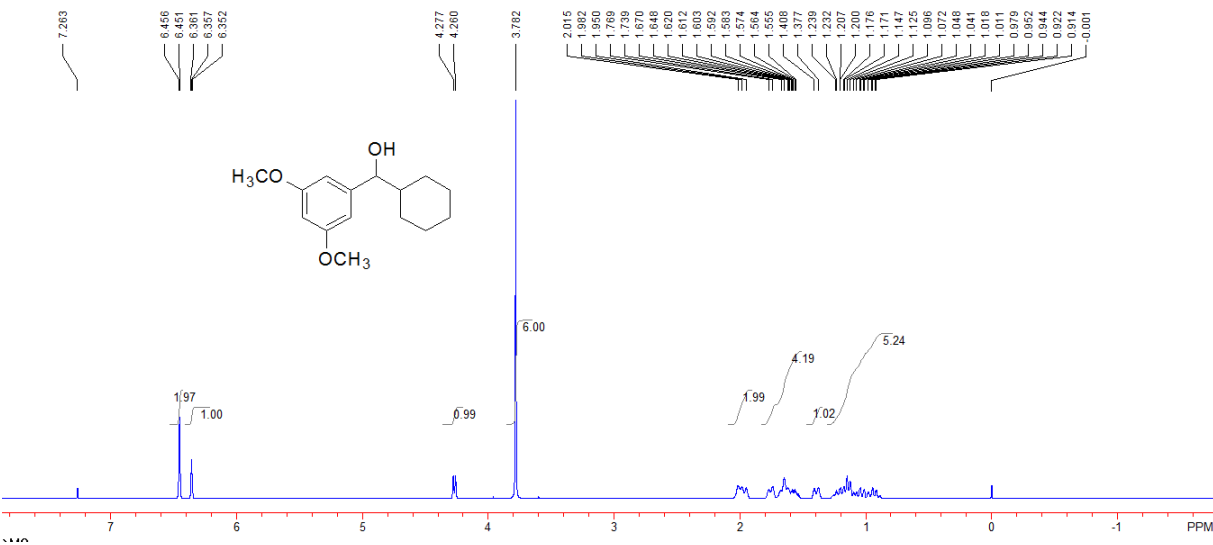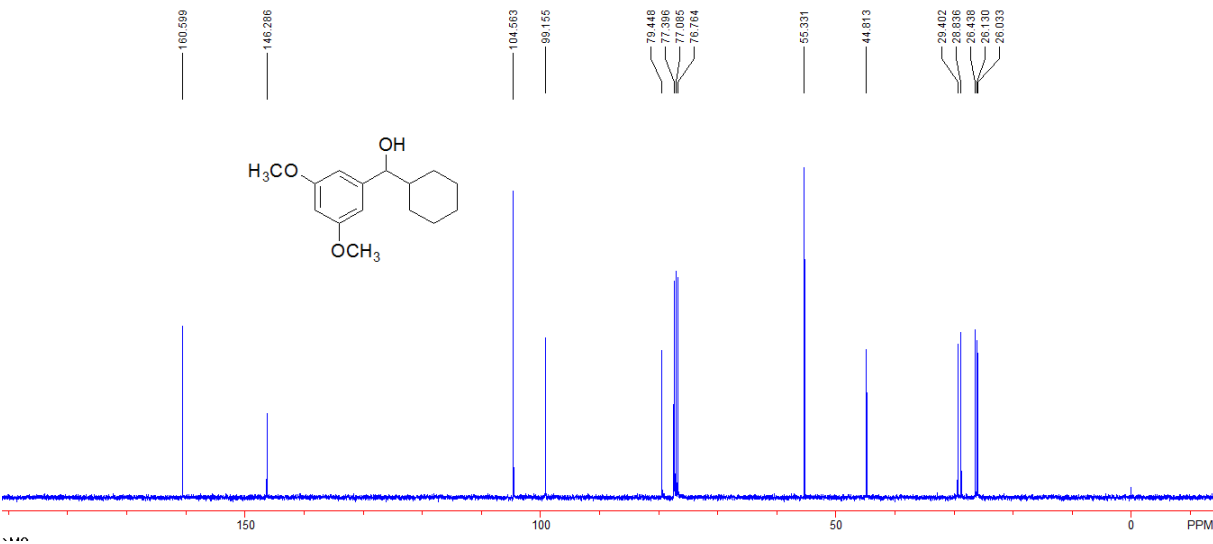

(+)-Cyclohexyl(2-thienyl)methanol (5a)

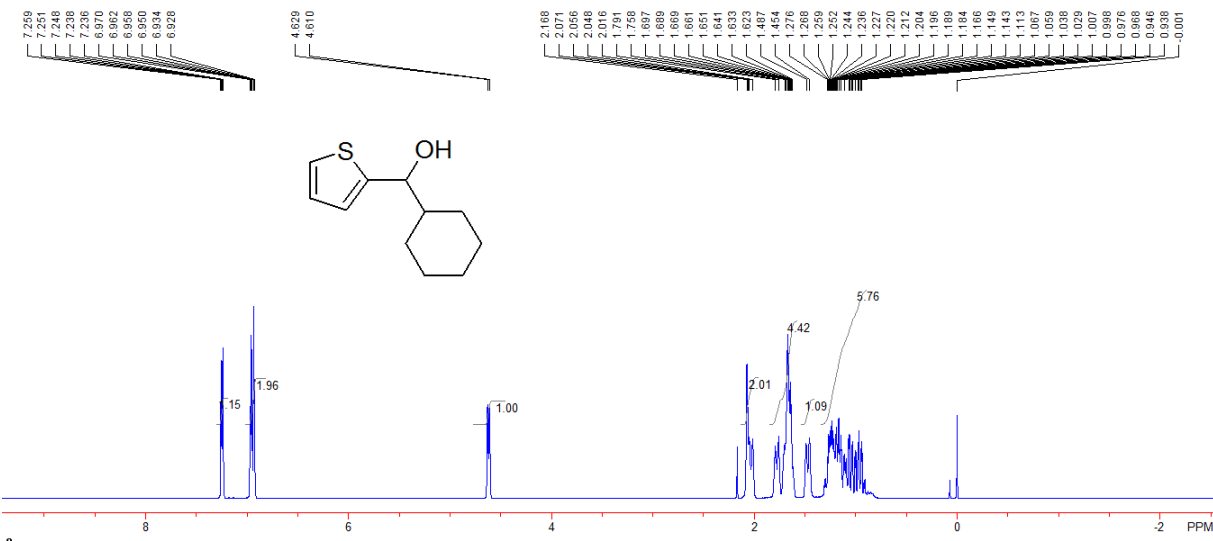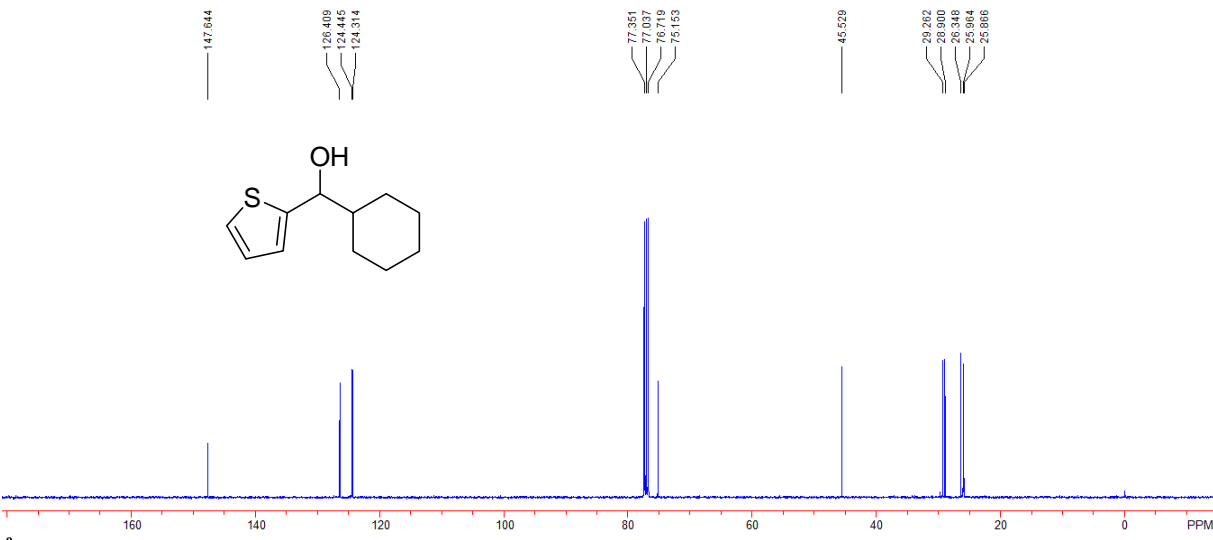

(-)-Cyclohexyl(3-thienyl)methanol (5b)

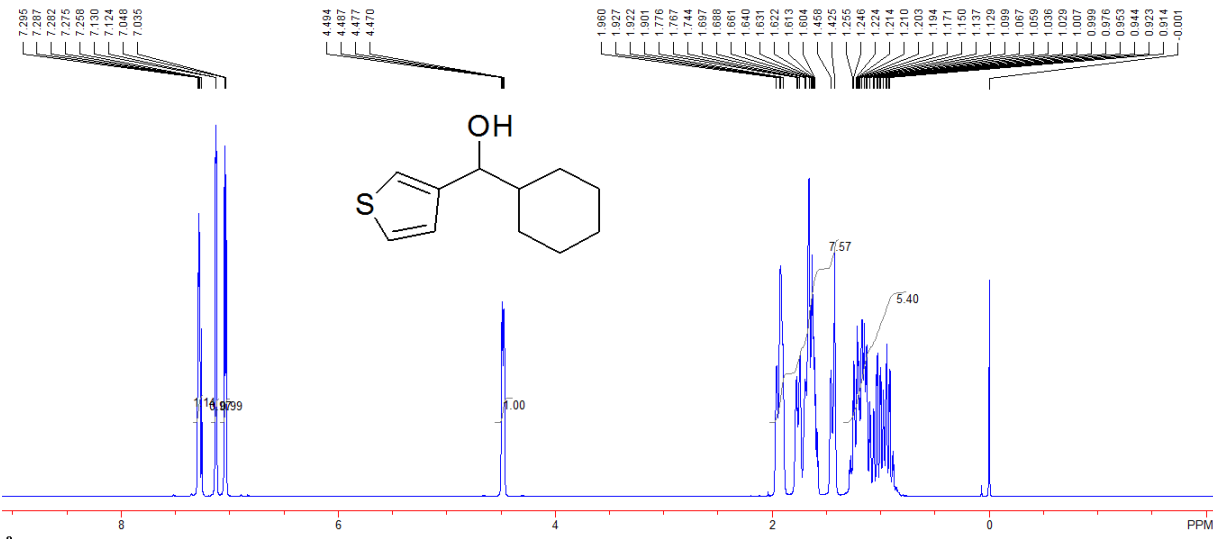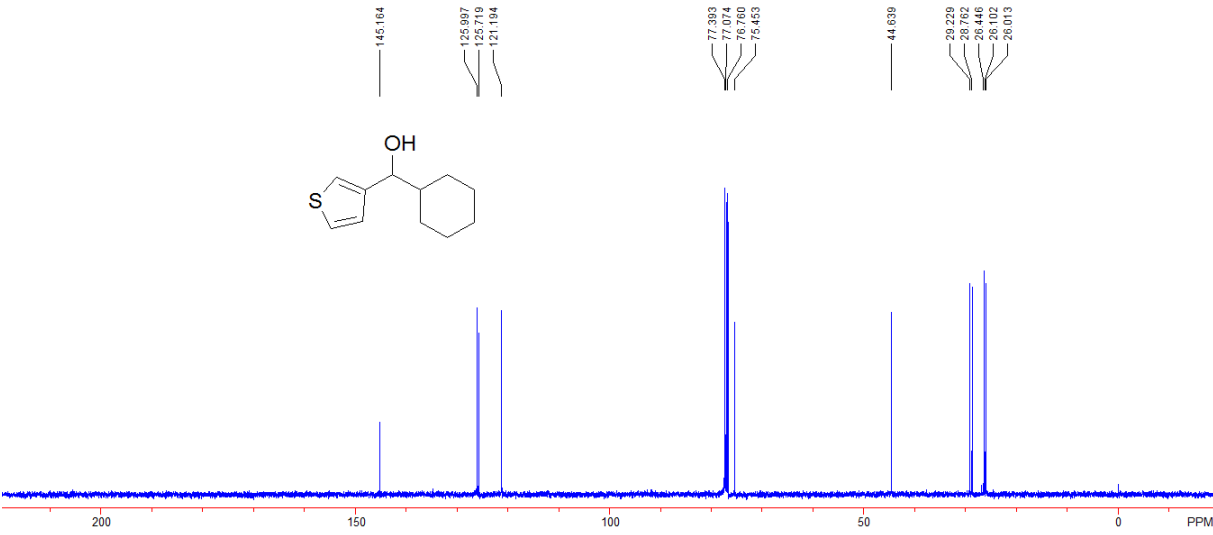

**(-)-Cyclohexyl(2-furyl)methanol (5c)**

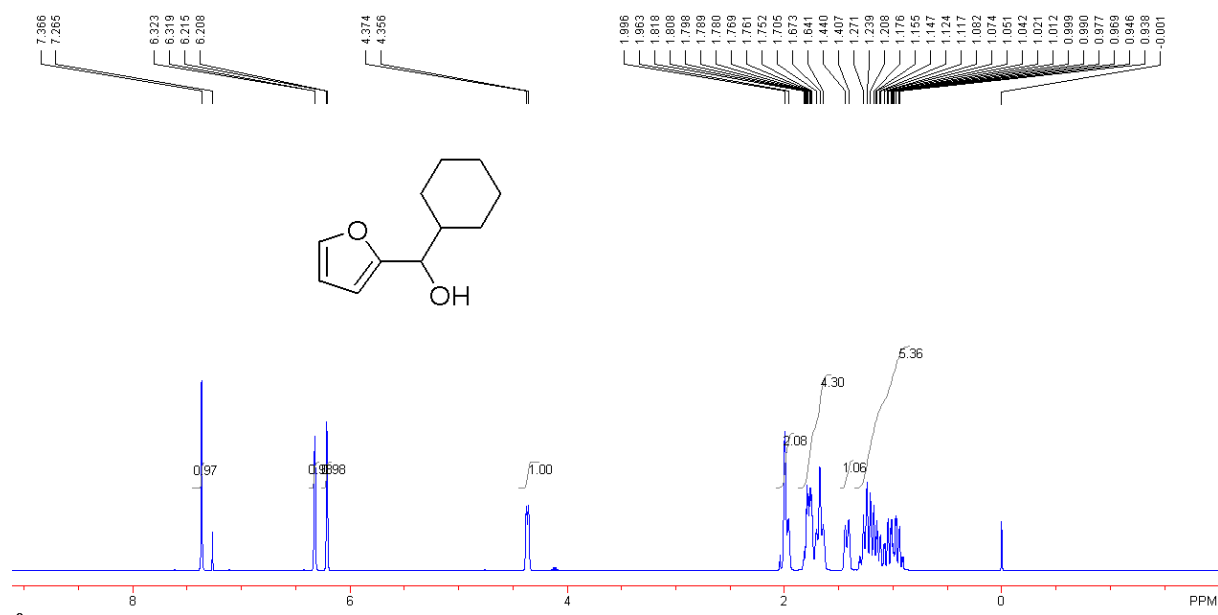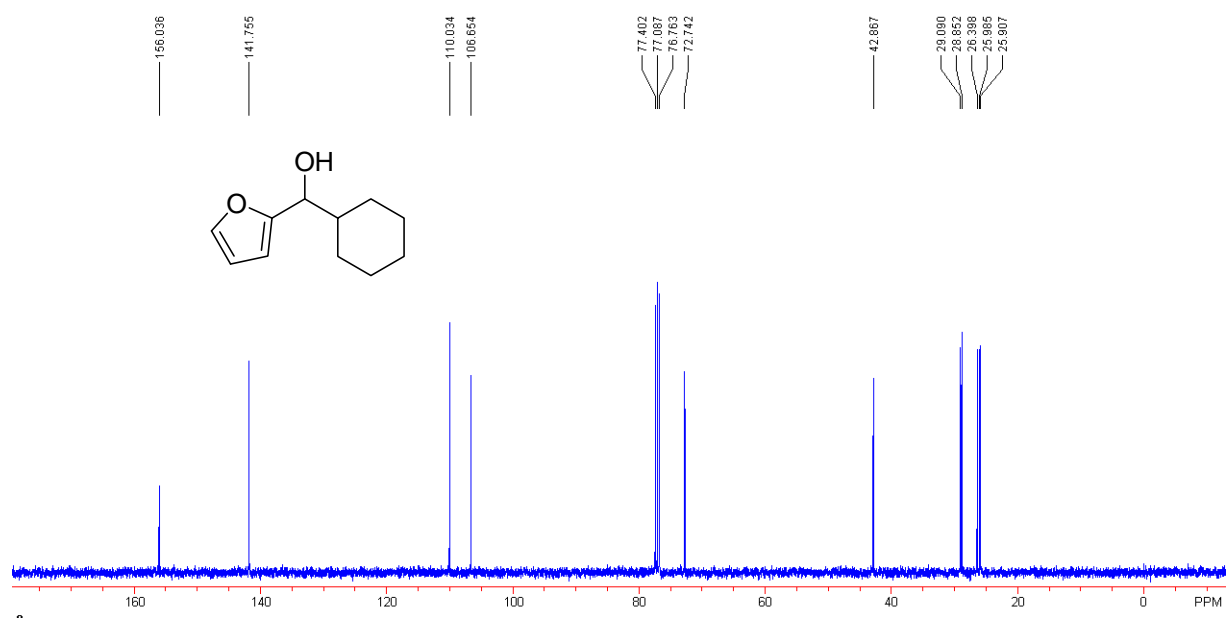

**(+)-Benzo[*b*]2-thienyl(cyclohexyl)methanol (5d)**

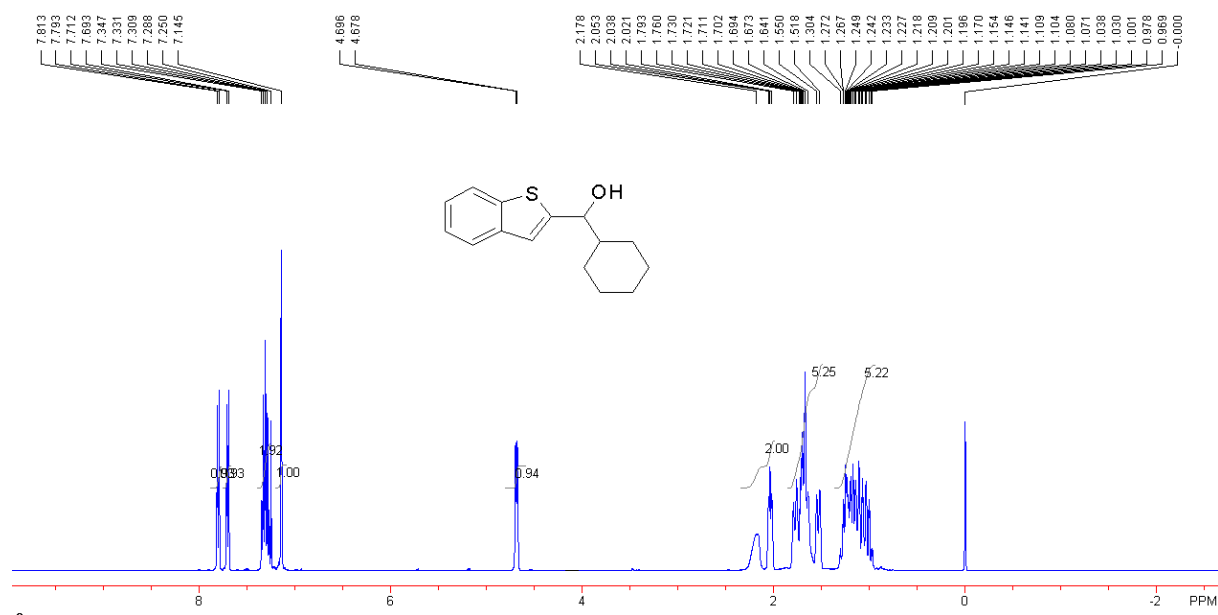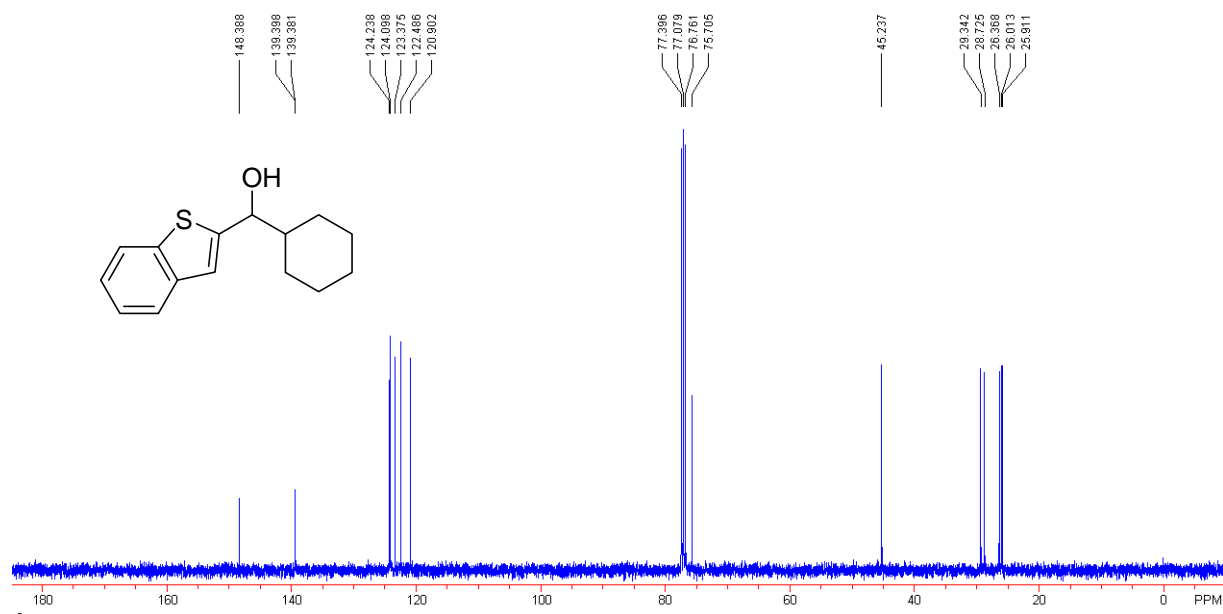

**(-)-Cyclohexyl(2-pyridyl)methanol (5e)**

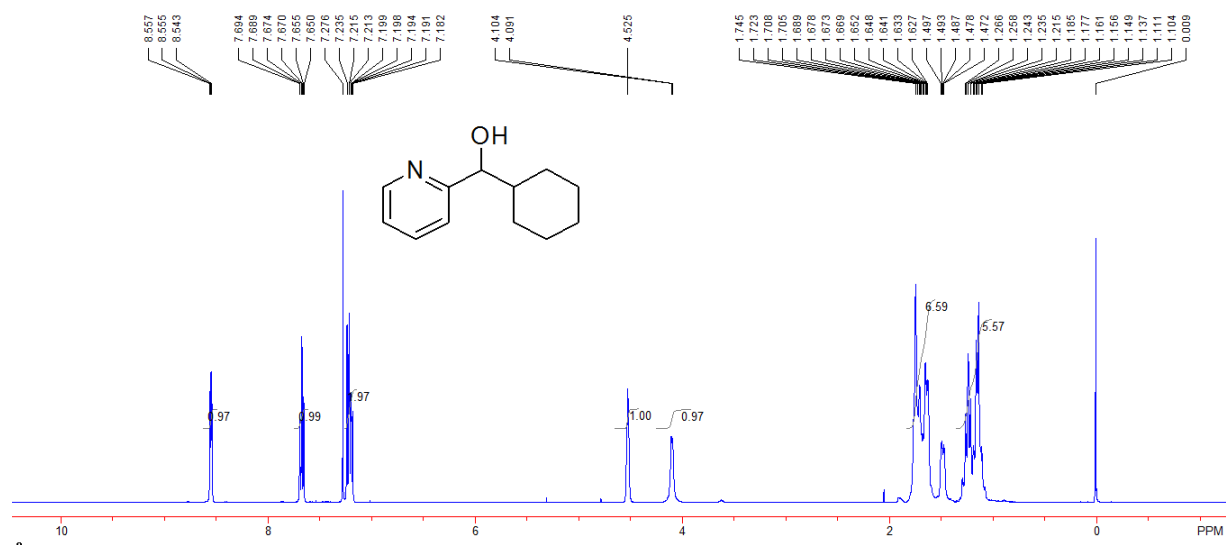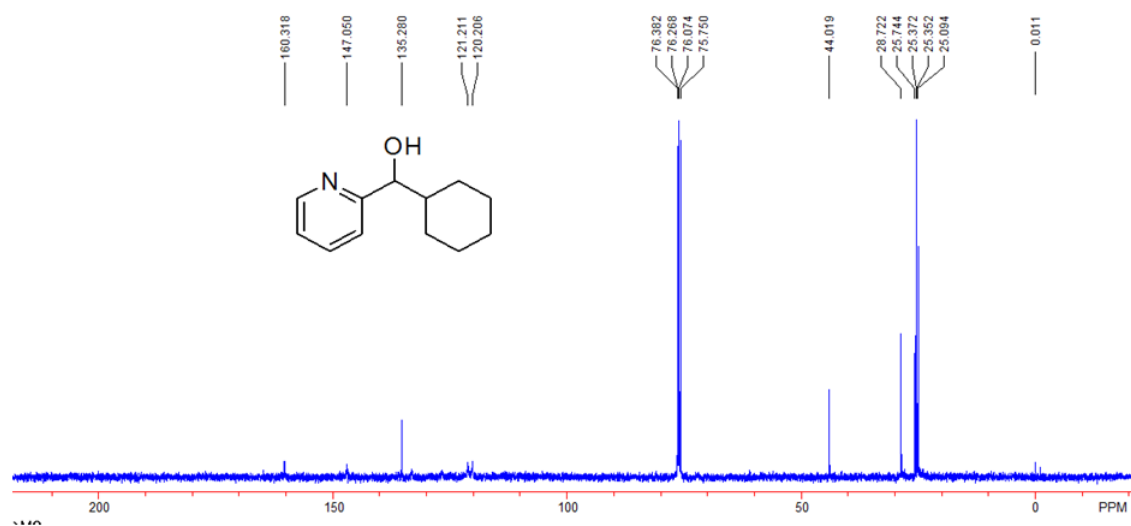

(-)-Cyclohexyl(3-pyridyl)methanol (5f)

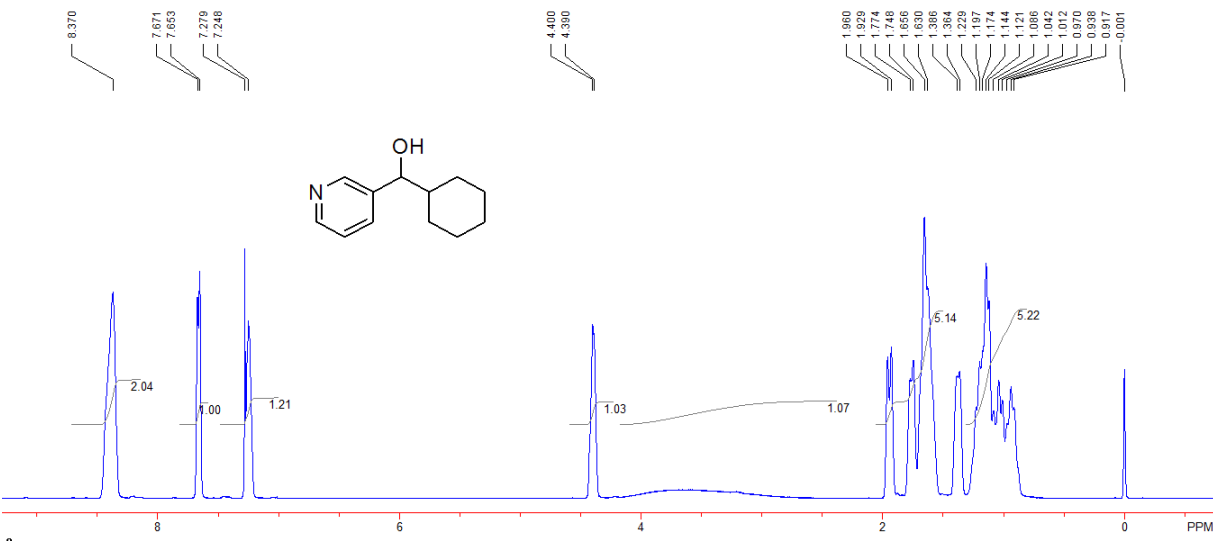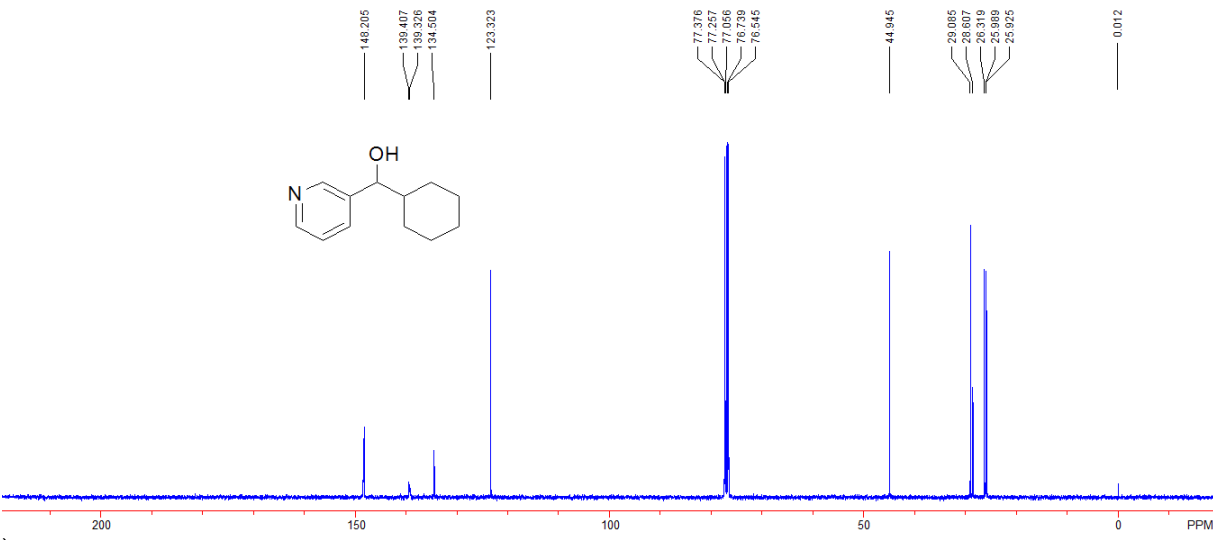



(-)-Cyclohexyl(4-pyridyl)methanol (5g)

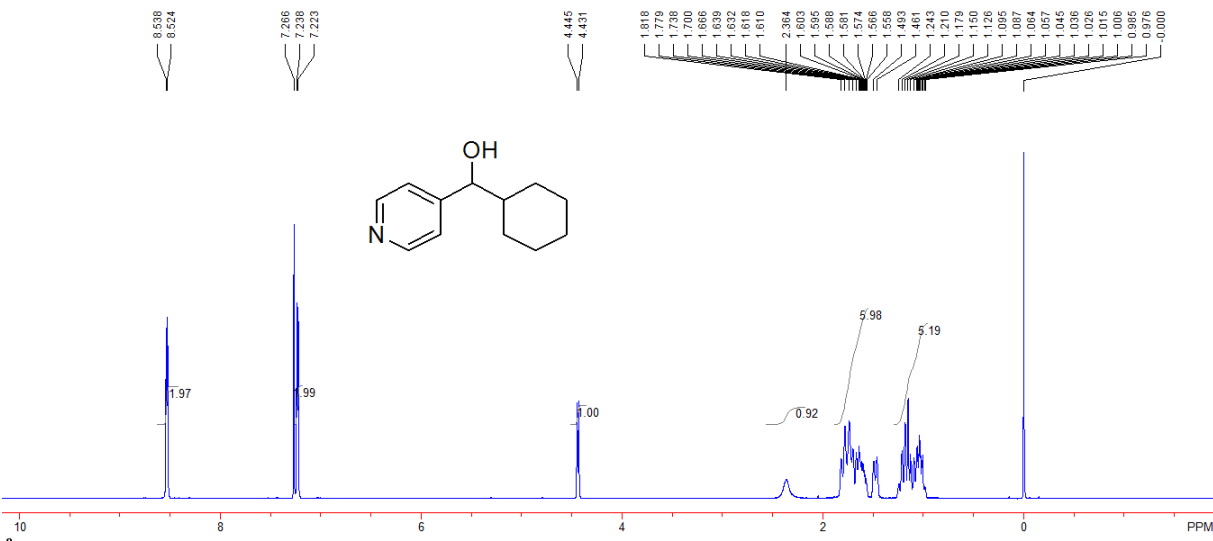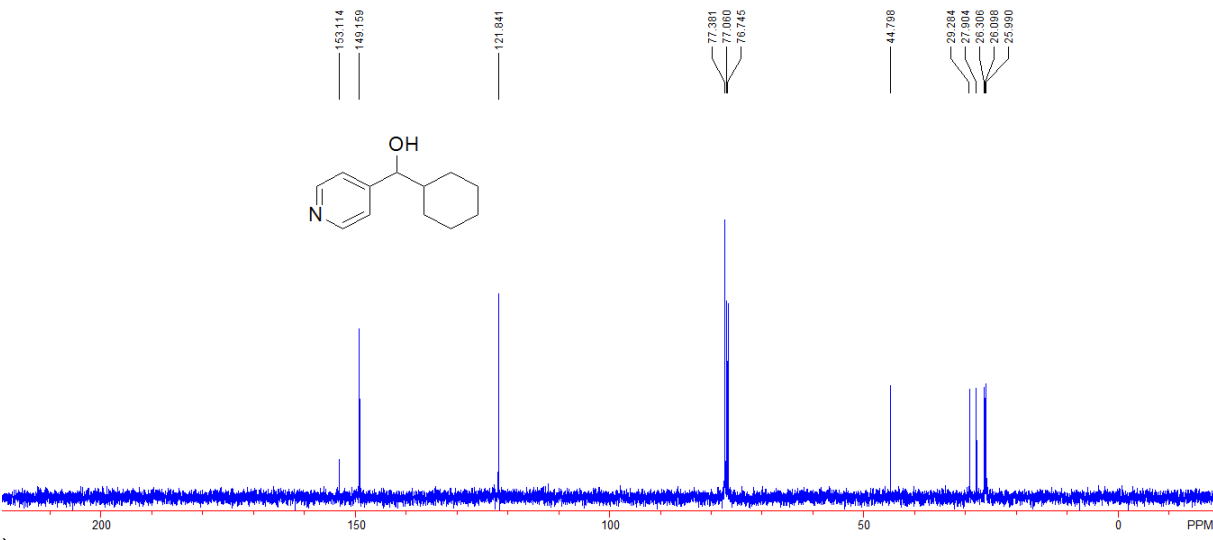

Supplement: c2ob27040d.pdf [file c2ob27040d.pdf]
